1  
2  
3  
4  
5  
6  
7  
8  
9  
10  
11  
12  
13  
14  
15  
16  
17  
18  
19  
20  
21  
22  
23

Specificity and Mechanism of Coronavirus, Rotavirus and Mammalian  
Two-Histidine-Phosphoesterases That Antagonize Antiviral Innate Immunity

Abhishek Asthana<sup>1</sup>, Christina Gaughan<sup>1</sup>, Susan R. Weiss<sup>2,3</sup> and Robert H. Silverman<sup>1,\*</sup>

<sup>1</sup>Department Cancer Biology, Cleveland Clinic Foundation, Lerner Research Institute, Cleveland, OH, 44195, United States; <sup>2</sup>Department of Microbiology, <sup>3</sup>Penn Center for Research on Coronaviruses and Other Emerging Pathogens, Perelman School of Medicine at the University of Pennsylvania, Philadelphia, PA, 19104, United States

\* To whom correspondence should be addressed: Tel: 1-216-445-9650; Fax 1-216-445-6269; Email: [silverr@ccf.org](mailto:silverr@ccf.org)

24 **ABSTRACT**

25

26 2',5'-oligoadenylate(2-5A)-dependent endoribonuclease, RNase L, is a principal  
27 mediator of the interferon (IFN) antiviral response. Therefore, regulation of cellular  
28 levels of 2-5A is a key point of control in antiviral innate immunity. Cellular 2-5A levels  
29 are determined by IFN-inducible 2',5'-oligoadenylate synthetases (OASs) and by  
30 enzymes that degrade 2-5A. Importantly, many coronaviruses and rotaviruses encode  
31 2-5A degrading enzymes thereby antagonizing RNase L and its antiviral effects. A-  
32 kinase anchoring protein 7 (AKAP7), a mammalian counterpart, could possibly limit  
33 tissue damage from excessive or prolonged RNase L activation during viral infections or  
34 from self double-stranded-RNAs that activate OAS. We show these enzymes,  
35 members of the two-histidine-phosphoesterase (2H-PE) superfamily, constitute a sub-  
36 family referred here as 2',5'-PEs. 2',5'-PEs from mouse coronavirus (CoV) MHV (NS2),  
37 MERS-CoV (NS4b), group A rotavirus (VP3), and mouse (AKAP7) were investigated for  
38 their evolutionary relationships and activities. While there was no activity against 3',5'-  
39 oligoribonucleotides, all cleaved 2',5'-oligoadenylates efficiently, but with variable  
40 activity against other 2',5'-oligonucleotides. The 2',5'-PEs are shown to be metal ion-  
41 independent enzymes that cleave trimer 2-5A (2',5'-p<sub>3</sub>A<sub>3</sub>) producing mono- or di-  
42 adenylates with 2',3'-cyclic phosphate termini. Our results suggest that elimination of 2-  
43 5A might be the sole function of viral 2',5'-PEs, thereby promoting viral escape from  
44 innate immunity by preventing or limiting the activation of RNase L.

45

46 **IMPORTANCE**

47

48 Viruses often encode accessory proteins that antagonize the host antiviral immune  
49 response. Here we probed the evolutionary relationships and biochemical activities of  
50 two-histidine-phosphoesterases (2H-PEs) that allow some coronaviruses and  
51 rotaviruses to counteract antiviral innate immunity. In addition, we investigated the  
52 mammalian enzyme, AKAP7, which has homology and shared activities with the viral  
53 enzymes and might reduce self-injury. These viral and host enzymes, that we refer to  
54 as 2',5'-PEs, specifically degrade 2',5'-oligoadenylate activators of the antiviral enzyme  
55 RNase L. We show that the host and viral enzymes are metal ion independent and  
56 exclusively cleave 2',5'- and not 3',5'-phosphodiester bonds, producing cleavage  
57 products with cyclic 2',3'-phosphate termini. Our study defines 2',5'-PEs as enzymes  
58 that share characteristic conserved features with the 2H-PE superfamily but which have  
59 specific and distinct biochemical cleavage activities. These findings may eventually  
60 lead to pharmacologic strategies for developing antiviral drugs against coronaviruses,  
61 rotaviruses, and other viruses.

62

63

64

65

66

67 **INTRODUCTION**

68

69 How interferons (IFNs) inhibit viral infections, and how viruses antagonize the IFN  
70 antiviral response, have been investigated for the past few decades, but with renewed  
71 intensity as a result of the SARS-CoV-2 pandemic (1-4). Mammalian cells often detect  
72 and respond to viruses after sensing viral double-stranded (ds)RNA, a common viral  
73 pathogen associated molecular pattern (PAMP) that induces type I and type III IFNs (1,  
74 2). These IFNs induce expression of hundreds of IFN stimulated genes (ISGs),  
75 including numerous antiviral effector proteins (5). Included among the human antiviral  
76 proteins encoded by ISGs are 2',5'-oligoadenylate (2-5A) synthetases 1-3 (OAS1-3)  
77 consisting of one, two and three core OAS units, respectively (6-8). However, not all  
78 mammalian species express a similar set of homologous OASs, and some, but not all,  
79 related OASL proteins lack enzymatic activity (9, 10). Upon binding of, and activation  
80 by, viral dsRNA OAS1-3 synthesize 2-5A [ $p_3(A_2'p_5')_nA$ , where  $n=2$  to  $>3$ ] from ATP (7).  
81 The only known function of 2-5A is dimerization and activation of RNase L resulting in  
82 degradation of host and viral RNA, cessation of protein synthesis, apoptosis and  
83 inflammasome activation (11-15)(Fig. 1A). In addition to its antiviral effects, RNase L  
84 resulted in cell death in response to mutation of ADAR1 (adenosine deaminase acting  
85 on RNA-1) in a cell line or in cells treated with the DNA demethylating drug 5-aza-  
86 cytidine, both of which induce synthesis of self-dsRNA from repetitive DNA elements in  
87 the genome (16-18). Thus, regulation of 2-5A levels is critical for host cell viability as  
88 well as for control of viral infections and pathogenesis. Yet there are gaps in our  
89 knowledge of precisely how levels of 2-5A are established to restrict viral replication and

90 spread by RNase L activation while at the same time minimizing tissue damage to the  
91 host.

92

93 Regulation of 2-5A degradation is a key point of control in the OAS-RNase L pathway.

94 Previously, we identified several different members of the eukaryotic-viral LigT group of

95 the 2H-phosphoesterases (2H-PE) superfamily, named for two His-  $\phi$  -Thr/Ser-  $\phi$  motifs

96 (where  $\phi$  is a hydrophobic residue) that degrade 2-5A and therefore function as potent

97 RNase L antagonists (19, 20) (Fig. 1B). Here we refer to 2H-PE members that degrade

98 2',5'-oligoadenylates as 2',5'-PEs. Other members of the 2H-PE superfamily have

99 different activities, including 2',3'-cyclic nucleotide phosphodiesterase and 3',5'-

100 deadenylase activities (19, 21).

101

102 The prototype of the 2',5'-PEs is the mouse coronavirus (CoV), mouse hepatitis virus

103 (MHV), accessory protein NS2 (22). However, predicted or confirmed 2',5'-PEs are

104 expressed by many betacoronaviruses (embecovirus lineage MHV, human coronavirus

105 (HCoV) OC43, human enteric coronavirus (HECoV), equine coronavirus (ECoV),

106 porcine hemagglutinating encephalomyelitis virus (PHEV) and merbeco lineage MERS-

107 CoV and related bat CoVs), related toroviruses and group A and B rotaviruses (20, 23-

108 26). However, the betacoronaviruses SARS-CoV and SARS-CoV-2 lack a 2',5'-PE.

109 Perhaps as a consequence, SARS-CoV-2 activates, and is inhibited by, the OAS and

110 RNase L pathway (4). In addition, there is also a mammalian 2',5'-PE, A-kinase

111 anchoring protein (AKAP7, aka AKAP15 or AKAP18), that degrades 2-5A (27). Here

112 we have expressed, purified and characterized the 2',5'-PEs from MHV (NS2), MERS-

113 CoV (NS4b), rotavirus group A (RVA) (VP3-C-terminal domain, CTD), and mouse  
114 AKAP7. We show that NS2 and NS4b are remarkably specific for cleaving 2',5'-linked  
115 oligoadenylates, whereas AKAP7 and VP3-CTD will also cleave other 2',5'-  
116 oligonucleotides. In contrast, all of the viral and mammalian 2',5'-PEs tested lack the  
117 ability to cleave 3',5'-oligoribonucleotides. We further show that these enzymes are  
118 metal ion-independent and cleave trimer 2-5A (2',5'-p<sub>3</sub>A<sub>3</sub>) producing mono- and di-  
119 adenylates with 2',3'-cyclic phosphoryl termini. Our findings suggest that the sole  
120 function of the viral 2',5'-PEs may be to eliminate 2-5A allowing some coronaviruses  
121 and rotaviruses to evade the antiviral activity of RNase L.

122

## 123 **RESULTS**

124

### 125 **Phylogenetic relationship and alignment of viral and cellular 2',5'-PEs.**

126 To probe the precise molecular mechanism by which 2',5'-PEs allow some viruses to  
127 evade the antiviral effector RNase L, we further investigated MHV NS2, MERS-CoV  
128 NS4b, rotavirus group A (RVA) VP3-C-terminal domain (CTD), and mouse (mu)AKAP7,  
129 (Fig. 1B). A comparison of the domain organization of these 2',5'-PEs shows a related,  
130 catalytic domain. Some of these enzymes have additional domains related to  
131 intracellular localization, nucleic acid metabolism or protein binding functions indicative  
132 of their cellular compartment-specific or accessory functions (Fig. 1B). For instance,  
133 MERS-CoV NS4b and muAKAP7 contain N-terminal nuclear localization signal (NLS)  
134 domains (24, 27, 28). VP3 is a multifunctional enzyme that contains N-terminal  
135 guanylyltransferase (Gtase) and methyltransferase (Mtase) domains involved in capping

136 of the 5' termini of viral mRNAs (25, 29). muAKAP7 also has a carboxy-terminal binding  
137 domain for the regulatory subunit II (RII) of cyclic AMP (cAMP)-dependent protein  
138 kinase A (PKA-RII- $\alpha$ -BD) (27). In addition, MHV NS2 protein has a C-terminal  
139 extension of unknown identity or function (Fig. 1B).

140

141 To determine the phylogenetic relationships between the different 2',5'-PEs, we  
142 constructed a tree for amino acid sequences containing the catalytic domains from  
143 coronavirus, rotavirus and mammalian 2',5'-PEs (Fig. 2A). 2',5'-PEs were distributed  
144 into two distinct branches on the phylogenetic tree. VP3 group of proteins clustered into  
145 one branch while the other three groups containing NS2, NS4b and AKAP7 formed a  
146 separate branch (Fig. 2A). Within the VP3 group, RVA and RVB resolved on distinct  
147 sub-branches. Previously, full-length VP3 from RVA and RVB were also shown as  
148 separate distinct branches analogous to two separate clades (clade A and clade B) (30,  
149 31). Interestingly, the NS2 proteins were mostly closely related to the mammalian  
150 AKAP7 catalytic domains, and then to the bat coronaviruses (HKU5 and SC2013) and  
151 MERS-CoV. The rotavirus VP3 proteins were most distally related to the other 2',5'-  
152 PEs.

153

154 Based on the phylogenetic relationship and functional relatedness, we further analyzed  
155 the sequence conservation by amino acid alignment. 2H-PE superfamily members are  
156 characterized by the presence of two H- $\phi$ -S/T- $\phi$  motifs, separated by an average of 80  
157 amino acids (where  $\phi$  represents a hydrophobic amino acid) (19). The alignment shows  
158 that both motifs are highly conserved across all 2',5'-PE proteins (Fig. 2B, see boxes).

159 These motifs form the catalytic core that bind to and cleave the 2-5A substrate.  
160 Consistent with the phylogenetic analysis, sequence analysis revealed that 2',5'-PEs  
161 clustered into four groups corresponding to NS2, NS4b, AKAP7 and VP3. The two  
162 histidines within the conserved motifs were 100% conserved among all the sequences  
163 (Fig. 2B, see asterisks). Several residues with intergroup consensus of >50% were  
164 identified in the alignment. The amino acid alignment shows several regions of  
165 conservation that exist beyond the two conserved catalytic motifs (H- $\phi$ -S/T-  $\phi$ ) (Fig. 2B,  
166 shown above sequence alignment).  
167  
168 Among the sequences in alignment, AKAP7 proteins of human, rat and mouse origin  
169 shared the highest amino acid identity ranging between 85 to 97% (88 to 97% similarity)  
170 (Table S1). NS2 proteins shared 48 to 92% identity (64 to 94% similarity), NS4b  
171 proteins shared 35 to 49% identity (50 to 69% similarity), and VP3 proteins shared 16 to  
172 78% identity (29 to 84% similarity) within their groups. Interestingly while RVA VP3  
173 proteins shared a high 78% identity (84% similarity) between them, they share only 16%  
174 identity (29% similarity) with the representative of RVB VP3 protein. The catalytic  
175 domains of 2',5'-PEs have modest intragroup alignment and a relatively lower  
176 intergroup alignment. Overall intergroup alignment for the catalytic domains of these  
177 proteins shown 10 to 22% identity (19 to 36% similarity) (Table S1). NS2 proteins  
178 shared 11 to 16% amino acid identity (24 to 29% similarity) with NS4b, 16 to 22%  
179 identity (30-36% similarity) with AKAP7 and 16 to 22% identity (26 to 32% similarity)  
180 with VP3 proteins. Similarly, NS4b group of proteins shared 12 to 18% identity (21 to  
181 29% similarity) with AKAP7 and 10 to 19% identity (23 to 34% similarity) with VP3



182 proteins. AKAP7 and VP3 shared 11 to 20% identity and 19 to 25% similarity between  
183 the two groups.

184

185 **2',5'-PEs are specific for 2',5'-linked phosphodiester bonds and preferably cleave**  
186 **2',5'-oligoadenylate.**

187 2',5'-PEs are members of the LigT family of the 2H-PE superfamily of enzymes, which  
188 are involved in RNA processing that can act on diverse substrates (19). Also, members  
189 such as MERS-CoV NS4b and muAKAP7 have a functional NLS peptide (24, 27). To  
190 determine if there was a wider role for these enzymes beyond cleaving 2-5A, we tested  
191 an expanded set of potential substrates. MERS-NS4b, MHV NS2, RVA VP3-CTD and  
192 muAKAP7 proteins were expressed in bacteria and then purified. Also, for comparison,  
193 human PDE12 (aka 2'-PDE), a member of the exonuclease-endonuclease-phosphatase  
194 (EEP) family known to cleave 2-5A was purified (Fig. 1B) (32, 33). The catalytically  
195 inactive mutant proteins, MERS-NS4b<sup>H182R</sup>, MHV NS2<sup>H126R</sup>, RVA VP3-CTD<sup>H718A</sup>,  
196 muAKAP7<sup>H93A; H185R</sup> and human PDE12<sup>E351A</sup> served as the negative controls. Purity and  
197 identity of trimer 2-5A (2',5'-p<sub>3</sub>A<sub>3</sub>) were confirmed by HPLC (Fig. 3A) and mass  
198 spectrometry [described later for (Fig. 5J)]. Purified 2',5'-PE proteins were incubated  
199 with 2-5A substrate at 30°C for 1 h and the 2-5A cleavage products analyzed by HPLC  
200 using a C18 column. All five wild type proteins cleaved 2-5A as observed by loss of  
201 intact 2-5A and appearance of peaks for the different cleavage products (Fig. 3B-F).  
202 Interestingly, MERS-NS4b (Fig. 3B) and MHV NS2 (Fig. 3C) degraded 2-5A to give two  
203 prominent products whereas RVA VP3-CTD (Fig. 3D) and muAKAP7 (Fig. 3E) gave  
204 four products upon extended degradation of 2-5A suggesting a difference in either

205 mechanism or rate of cleavage by these proteins. On the other hand, 2-5A cleavage by  
206 human PDE12 (Fig. 3F) results in the formation of two products corresponding to the  
207 elution time of the standard ATP and 5'-AMP, as previously described (32). As  
208 expected, the 2',5'-PE catalytically inactive mutant proteins containing a His-to-Arg or  
209 His-to-Ala mutations in the conserved histidines did not cleave 2-5A (Fig. 3G-J). Human  
210 PDE12 with Glu-to-Ala mutation at 351 amino acid residue also did not degrade 2-5A,  
211 as described previously (34) (Fig. 3K). Importantly, these findings show a different mode  
212 of 2-5A cleavage between 2',5'-PEs, members of the 2H-PE superfamily, and PDE12, a  
213 member of the EEP family of phosphodiesterases.

214 To investigate the expanded substrate specificity of 2',5'-PEs, we tested possible  
215 cleavage of various 2'-5' and 3'-5' linked oligoribonucleotides by HPLC. Purified 2',5'-PE  
216 proteins (1  $\mu$ M) were incubated with either 2'-5'- or 3'-5'-linked pentaribonucleotide  
217 substrates (10  $\mu$ M) at 30°C for 1 h. Wild type MERS-NS4b, specifically degraded 2'-5'  
218 p5'(rA)<sub>5</sub> by >99% while 2'-5' p5'(rU)<sub>5</sub>, p5'(C)<sub>5</sub> or p5'(G)<sub>5</sub> were not degraded ( $\leq$ 4%)  
219 (Table S2). Catalytically inactive mutant MERS-NS4b<sup>H182R</sup> did not degrade any of the  
220 tested substrates under similar conditions. Wild type MHV NS2 also specifically  
221 degraded 2'-5' p5'(rA)<sub>5</sub> >99% while 2'-5' p5'(rU)<sub>5</sub>, p5'(C)<sub>5</sub> or p5'(G)<sub>5</sub> were not degraded  
222 ( $\leq$ 7%) (Table S2). Mutant MHV NS2<sup>H126R</sup> did not degrade any of the tested substrates.  
223 These results suggest MERS-NS4b and MHV NS2 are remarkably specific in degrading  
224 2'-5' linked oligoadenylate compared to the other substrates. We further tested RVA  
225 VP3-CTD which degraded 2'-5' p5'(rA)<sub>5</sub> >95%, p5'(rU)<sub>5</sub> ~ 40%, p5'(C)<sub>5</sub> ~90%, and  
226 p5'(G)<sub>5</sub> ~6% while mutant RVA VP3-CTD<sup>H718A</sup> did not degrade any of the tested  
227 substrates (Table S2). Wild type muAKAP7 degraded 2'-5' p5'(rA)<sub>5</sub> >99%, p5'(rU)<sub>5</sub>

228 >95%, p5'(C)<sub>5</sub> >95%, and p5'(G)<sub>5</sub> >90% while mutant muAKAP7<sup>H93A;H185R</sup> did not  
229 degrade any of the tested substrates with the exception of 2'-5' p5'(G)<sub>5</sub> ~40% (Table  
230 S2). To ensure that exclusive cleavage of 2',5'-oligoadenylates by MERS-NS4b was  
231 not due to limiting amounts of enzyme, 10 μM of different 2',5'-linked penta-  
232 ribonucleotides were incubated with three-fold higher concentrations (3 μM) of MERS-  
233 NS4b at 30°C for 1h. Wild type MERS-NS4b specifically degraded 2'-5' p5'(rA)<sub>5</sub> >99%  
234 while 2'-5' p5'(rU)<sub>5</sub>, p5'(C)<sub>5</sub> or p5'(G)<sub>5</sub> were not degraded (≤6%) suggesting MERS-  
235 NS4b enzymatic activity is specific for degradation of 2',5'-oligoadenylates (Table S3).  
236 Because MERS NS4b and MHV NS2 cleaved 2'-5' p5'(rA)<sub>5</sub> but not other 2'-5'-linked  
237 substrates, we further determined if this was due to lack of binding to the other  
238 substrates. To test this possibility, 10 μM of 2'-5' p5'(rA)<sub>5</sub> was incubated with 0.2 μM of  
239 MHV NS2 in the absence or presence of increasing concentrations of 2'-5' p5'(rU)<sub>5</sub> at  
240 30°C for 10 min. The amounts of 2'-5' p5'(rA)<sub>5</sub> degraded by MHV NS2 in the presence  
241 of 0, 3.1, 10, 12.5, 25, 50 and 100 μM was determined by HPLC analysis (Fig. S1).  
242 Degradation of 2'-5' p5'(rA)<sub>5</sub> by MHV NS2 decreased as the amount of 2'-5' p5'(rU)<sub>5</sub> in  
243 the reaction increased beyond 10 μM (i.e. ratio >1:1) (Fig. S1). Our results suggests  
244 that 2'-5' p5'(rU)<sub>5</sub> was able to bind MHV NS2 and competitively interfere with MHV NS2  
245 ability to cleave 2'-5' p5'(rA)<sub>5</sub>.

246 We next tested degradation activity of 2',5'-PEs against 3'-5' linked p5'(rA)<sub>5</sub>, p5'(rU)<sub>5</sub>  
247 and p5'(C)<sub>5</sub>. One μM of enzyme was incubated with 10 μM of the substrate at 30°C for 1  
248 h. Wild type MERS-NS4b and its mutant MERS-NS4b<sup>H182R</sup>, wild type MHV NS2 and its  
249 mutant NS2<sup>H126R</sup>, RVA VP3-CTD and its mutant RVA VP3-CTD<sup>H718A</sup>, and wild type  
250 muAKAP7 and its mutant muAKAP7<sup>H93A;H185R</sup> (Table S2) did not degrade the 3'-5'

251 linked substrates 3'-5' p5'(A)<sub>5</sub>, 3'-5' p5'(U)<sub>5</sub>, and 3'-5' p5'(C)<sub>5</sub>. [We were unable to  
252 obtain 3'-5' p5'(G)<sub>5</sub> because of repeated failures of its chemical synthesis and/or  
253 purification, therefore this oligonucleotide could not be tested]. Our results suggest that  
254 all of the 2',5'-PEs examined are highly specific for cleaving 2',5' linked  
255 oligoribonucleotides. Among 2',5' linked substrates MERS-NS4b and MHV NS2, are  
256 specific for cleaving 2'-5' oligoadenylate, whereas RVA VP3-CTD cleaved in order: 2'-5'  
257 pA<sub>5</sub>>pC<sub>5</sub>>pU<sub>5</sub>>>pG<sub>5</sub> and muAKAP7 cleaved all of 2',5' linked pentanucleotides with  
258 similar efficacy.

259 Based on the differential enzymatic activity of these 2',5'-PEs in degrading different  
260 types of 2',5'-linked phosphodiester substrates, we tested if they could degrade 2',3'-  
261 cyclic-GMP-AMP (cGAMP). cGAMP is a cyclic-dinucleotide secondary messenger with  
262 mixed phosphodiester linkages between 2'-OH of GMP to 5'-phosphate of AMP and 3'-  
263 OH of AMP to 5'-phosphate of GMP, synthesized by cyclic GMP-AMP-synthase  
264 (cGAS) in response to cytoplasmic dsDNA (35). cGAMP was incubated either with or  
265 without wild type and mutant 2',5'-PEs at 30°C for 1h and analyzed by HPLC. Wild type  
266 MERS-NS4b, MHV NS2, RVA VP3-CTD, and muAKAP7 did not degrade 2',3'-cGAMP  
267 whereas they did degrade 2',5'-p<sub>3</sub>A<sub>3</sub> (served as a positive control) under similar  
268 conditions (Table S4). Catalytic mutants of 2',5'-PEs tested did not degrade 2',3'-  
269 cGAMP or 2',5'-p<sub>3</sub>A<sub>3</sub> under similar conditions. The results suggest that 2',5'-PEs are  
270 capable of cleaving 2',5'-phosphodiester bonds in linear homo-ribonucleotides but not in  
271 the cyclic-mixed phosphodiester linked 2',3'-cGAMP.

272

273 **2',5'-PEs exhibit metal ion-independent phosphodiesterase activity.**

274 Metal ion dependency was evaluated by performing assays in either the presence of  
275 EDTA or magnesium. In the presence of EDTA, without added magnesium, 1  $\mu$ M of  
276 MERS-NS4b (Fig. 4A) or MHV NS2 (Fig. 4B) degraded >90% of 2-5A in ~20 min  
277 whereas 0.05  $\mu$ M of RVA VP3 CTD (Fig. 4C) and 1 $\mu$ M of muAKAP7 (Fig. 4D) degraded  
278 >90% of the 2-5A within 5 min. Relative rates of 2-5A degradation by RVA VP3-CTD >>  
279 muAKAP7 > MHV NS2 = MERS-NS4b were observed. Based on the specific activities,  
280 the ratio of fold activity of RVA VP3-CTD: muAKAP7: MERS-NS4b: MHV NS2 was 38.9:  
281 2.9: 1: 1. It is noteworthy that many mammalian cell types have a total cellular  $Mg^{2+}$   
282 concentration in between 17 to 20 mM, of which only 5-22% may be free depending on  
283 the cellular compartment. (36). We determined the specific activities of the 2',5'-PEs for  
284 degrading 2-5A in the absence and presence of 10 mM  $MgCl_2$  at 5 min (Fig. 4E). The  
285 addition of  $Mg^{2+}$  ions decreased the specific activity of MERS-NS4b to ~0.6 fold and that  
286 of muAKAP7 to ~0.8 fold. The activity of MHV NS2 and RVA VP3-CTD showed a  
287 negligible decrease to 0.97 fold and 0.99 fold in the presence of  $Mg^{2+}$  ions, respectively.  
288 Our results suggest that the 2',5'-PEs activity of these proteins is independent of  $Mg^{2+}$   
289 ions and its presence either slightly decreases or has no effect on the activity of these  
290 enzymes.

291

292 **2',5'-PEs cleave 2',5'-linked oligoadenylate leaving products with cyclic 2',3'**  
293 **phosphoryl termini.**

294 Differences in the 2-5A cleavage products as determined by HPLC (Fig. 3) suggested  
295 that viral and mammalian 2',5'-PEs cleave 2-5A via a different mechanism than human

296 PDE12, which degrades 2-5A to produce ATP and AMP (32). Among 2',5'-PEs, MERS-  
297 NS4b and MHV NS2 degraded 2-5A to give two cleavage products whereas RVA VP3-  
298 CTD and muAKAP7 gave four cleavage products. Therefore we decided to determine  
299 the precise cleavage sites in 2-5A by 2',5'-PEs. 2-5A was partially digested with MERS-  
300 NS4b (Fig. 5) or RVA VP3-CTD (Fig. 6) followed by the collection of individual peak  
301 fractions of cleavage products. Cleavage products were subsequently identified and  
302 confirmed by HPLC analysis (comparing elution time with known standards),  
303 identification by m/z ratio (LC/MS/MS analysis of collected peaks) or biochemical  
304 analysis (by 5'-dephosphorylation) (Figs. 5A & 6A).

305

306 Partial digestion of 2-5A by MERS-NS4b was confirmed by HPLC analysis of the  
307 samples using a C18 column (Fig. 5B) and comparing it with the chromatogram of intact  
308 2-5A (Fig. 3A). The partially digested 2-5A by MERS-NS4b was run on a Dionex  
309 DNAPac<sup>R</sup>PA-100 column in an ammonium bicarbonate volatile buffer system as  
310 described in Methods. Individual peaks were collected and processed for mass  
311 spectrometry analysis. Individually collected peaks were also rerun on a C18 column to  
312 confirm the purity and matched elution times of the collected peaks before performing  
313 LC/MS/MS (Figs. 5C, D). Mass spectrometric analysis of the peaks revealed an m/z  
314 ratio of 597.25 (Fig. 5H) and 570.4 (Fig. 5I). The m/z ratios of 597.25 and 570.4 were  
315 compared to the masses of potential 2-5A degradation/intermediate products (Fig. 5G)  
316 and were found to correspond to ApA and p<sub>3</sub>A>p (where ">p" represents a 2',3' cyclic  
317 phosphate), respectively. Intact 2-5A gave an m/z ratio of 584 for the double charged  
318 ion (Fig. 5J). Moreover, the collected peak of p<sub>3</sub>A>p (shown in Fig. 5D) was subjected to

319 SAP mediated 5' dephosphorylation which results in the peak corresponding to A>p  
320 (Fig. 5E, F). This experiment suggested that MERS-NS4b degrades 2-5A to produce a  
321 5'-product with 2',3' cyclic phosphate terminus in the form of p<sub>3</sub>A>p and a 3'-product of  
322 ApA. To test if p<sub>3</sub>A>p and ApA are end products of the reaction, we subjected 2-5A to  
323 extended degradation by MERS-NS4b and monitored the area under the peak  
324 corresponding to ApA at 0 h, 1 h, 4 h and 24 h (Fig. S2 A-D, I). After the ApA peak  
325 appears (at 1h) its amount remained unchanged up to 24 h. Also, 2'-5' linked 5'pApA  
326 incubated with MERS-NS4b did not result in any degradation (Fig. S2 E-H, I). These  
327 results suggest that MERS-NS4b does not cleave di-adenylates into smaller products  
328 irrespective of 5' mono-phosphorylation status under the given experimental conditions.  
329

330 With a similar approach, we designed an experiment to elucidate the cleavage products  
331 and intermediates formed upon 2-5A degradation by RVA VP3-CTD (Fig. 6A). Because  
332 RVA VP3-CTD has high specific activity against 2-5A (Fig. 4), 2-5A was incubated with  
333 decreased protein concentrations and times of incubation to capture any possible  
334 intermediates and degradation products of 2-5A (Fig. 6B, C). 2-5A cleaved by VP3-CTD  
335 forms products which based on the elution times of the known standards and  
336 compounds were identified as p<sub>3</sub>A>p, A>p, ApA, adenosine and an unknown  
337 intermediate (shown in grey color) (Fig. 6C). Based on potential degradation  
338 intermediates we speculated the unknown intermediate to be p<sub>3</sub>ApA>p. To test this  
339 possibility, a part of the sample reaction with 2-5A cleavage products (obtained from the  
340 sample used in Fig. 6C) was subsequently treated with SAP to remove 5'-  
341 phosphorylation from cleavage products (if any) which would result in the formation of

342 A>p and ApA>p from p<sub>3</sub>A>p and p<sub>3</sub>ApA>p, respectively (Fig. 6E). The dephosphorylated  
343 sample was analyzed by running it on a C18 column. After SAP treatment, the amount  
344 of adenosine and ApA remained constant when compared before (Fig. 6C) and after  
345 (Fig. 6D) dephosphorylation, as calculated by integrating the area under the peaks of  
346 the HPLC chromatograms. However, the total area under the peak corresponding to  
347 A>p increased suggesting A>p was formed as a result of dephosphorylation of p<sub>3</sub>A>p  
348 (Fig. 6C, D). Importantly, a new peak (possibly ApA>p) appears which is formed by  
349 dephosphorylation of an unknown intermediate (Fig. 6D, shown in grey color). The  
350 dephosphorylated samples were run on a Dionex DNAPac<sup>R</sup> PA-100 column in an  
351 ammonium bicarbonate volatile buffer system as described in the Methods. Individual  
352 peak fractions were collected and processed for mass spectrometry analysis. Collected  
353 peaks were rerun on a C18 column to confirm the purity and match the elution time of  
354 the collected peak with that of A>p and 'dephosphorylated intermediate' (Fig. 6D) before  
355 performing LC/MS/MS. Mass spectrometric analysis of the peaks revealed m/z ratios of  
356 330 corresponding to A>p (Fig. 6F) and 659.1 which corresponds to that of ApA>p (Fig.  
357 6G). This experiment suggests that trimer 2-5A (2',5'p<sub>3</sub>A<sub>3</sub>) degradation by RVA VP3-  
358 CTD proceeds via formation of p<sub>3</sub>ApA>p and ApA intermediates. RVA VP3-CTD  
359 degrades p<sub>3</sub>ApA>p to form p<sub>3</sub>A>p (5'-product) and A>p (3'-product) whereas di-  
360 adenylate (ApA) is further degraded to yield A>p (5'-product) and adenosine (3'-  
361 product). Complete degradation of p<sub>3</sub>A<sub>3</sub> by RVA VP3-CTD results in the formation of  
362 p<sub>3</sub>A>p, A>p and adenosine as end products (Fig. 3D). Further, the preferred site of p<sub>3</sub>A<sub>3</sub>  
363 cleavage by RVA VP3-CTD was investigated in a time-course experiment. RVA VP3-  
364 CTD (0.05 μM) was incubated with p<sub>3</sub>A<sub>3</sub> (200 μM) substrate at 30°C and samples were



365 collected at different time points. The substrate or product peaks at each time point  
366 were analyzed by calculating the percent of the area under the peaks of the HPLC  
367 chromatograms (Fig. S3) and tabulated (Fig. S4A). The analysis revealed that the  
368 majority of  $p_3A_3$  is cleaved by RVA VP3-CTD to produce  $p_3ApA>p$  (5'-product) and  
369 adenosine (3'-product). The intermediate species ( $p_3ApA>p$ ) is subsequently cleaved to  
370 produce  $p_3A>p$  (5'-product) and  $A>p$  (3'-product). A minor fraction of  $p_3A_3$  is cleaved by  
371 RVA VP3-CTD to produce  $p_3A>p$  (5'-product) and  $ApA$  (3'-product). The di-adenylate  
372 intermediate ( $ApA$ ) is subsequently cleaved into  $A>p$  (5'-product) and adenosine (3'-  
373 product) (Fig. S4B), which is apparent from incubations at a higher concentration of  
374 RVA VP3-CTD (Fig. 3D). Moreover, the degradation pattern of the two di-adenylate  
375 intermediates reveals that tri-phosphorylated intermediate ( $p_3ApA>p$ ) is readily cleaved  
376 by RVA VP3-CTD whereas  $ApA$  cleavage is slow suggesting 5'-tri-phosphorylated  
377 molecules are preferred over non-phosphorylated substrates (Figs. S3, S4). In a  
378 separate experiment, 10  $\mu$ M of 2'-5' linked  $5'p(A)_2$  was incubated with 1  $\mu$ M of VP3-CTD  
379 at 30°C for 1 h. The results confirmed the formation of cleavage products  
380 corresponding  $pA>p$  (5'-product) and adenosine (3'-product) (Fig. S5). Moreover, in  
381 another time-course experiment  $\mu$ AKAP7 cleaved  $p_3A_3$  to produce  $p_3A>p$  (5'-product)  
382 and  $ApA$  (3'-product) (Fig. S6). The  $ApA$  intermediate was further cleaved to form  $A>p$   
383 and adenosine. Interestingly, unlike RVA VP3-CTD,  $\mu$ AKAP7 mediated cleavage of  
384  $p_3A_3$  does not form  $p_3ApA>p$  intermediate.

385 Overall mechanisms and differences in degradation of 2-5A by representative EEP  
386 (PDE12) and 2',5'-PEs family members are summarized in figure 7. Human PDE12  
387 degrades trimer 2-5A into ATP and 2 (5'-AMP)s in the presence of  $Mg^{2+}$  ions, as has

388 been reported (32). On the other hand, mammalian and viral 2',5'-PEs, act in a metal-  
389 ion independent way, degrading 2-5A to form 5' products with 2',3' cyclic phosphates.  
390 All 2',5'-PEs quickly cleave active anti-viral 2-5A into inactive molecules that is, the  
391 products are not capable of activating RNase L because of a requirement for at least  
392 three adenylyl residues (37). MERS-NS4b and MHV NS2 degrade trimer 2-5A to form  
393 p<sub>3</sub>A>p and ApA. RVA VP3-CTD and muAKAP7 further cleave ApA to form A>p and  
394 adenosine as products. In addition to the above-mentioned degradation intermediates  
395 and products of 2-5A, RVA VP3-CTD also produced p<sub>3</sub>ApA>p as an intermediate,  
396 suggesting it to be a 2',5'-specific endoribonucleolytic phosphodiesterase (Figs. 6 & 7).

397

## 398 **DISCUSSION**

399

### 400 **Cleavage specificity and mechanism of 2',5'-PEs**

401

402 The 2',5'-PEs studied here exclusively cleaved 2',5'- and not 3',5'-phosphodiester  
403 bonds. There was also a strong preference for cleavage of 2',5'-oligoadenylates by NS2  
404 and NS4b and, to a lesser extent, by VP3-CTD, whereas AKAP7 had similar activities  
405 against the different 2',5'-linked pentamers of A, U, C and G. Therefore, although  
406 AKAP7 and VP3-CTD are not the mostly closely related 2',5'-PEs, they can both cleave  
407 2',5'-oligoribonucleotides other than 2-5A (Fig. 2A and Table S2). Interestingly, OASs  
408 are 2'-nucleotidyl transferases that not only use ATP as substrates but can produce  
409 diverse molecules with 2',5' linkages. NAD<sup>+</sup>, tRNAs, A5'p<sub>4</sub>5'A, and mono- and poly-  
410 ADP-ribose are acceptors for addition of 2',5'-AMP residues from ATP by OAS. Also,

411 OAS can add other 2'-terminal ribo- and deoxy-nucleotide monophosphates to 2-5A  
412 (38-41). However, which, if any, of these alternative 2-5A-like molecules can be cleaved  
413 by 2',5'-PEs remains to be determined. The cGAMP, a cyclic dinucleotide that activates  
414 STING, has one 2',5'-linkage and one 3',5'-linkage, but it is not cleaved by the 2',5'-PEs  
415 examined here (Table S4). VP3 was phylogenetically distal and has the most distinct  
416 mechanism of 2-5A cleavage compared to all of the tested 2',5'-PEs. It is also  
417 interesting to note that the two coronavirus 2',5'-PEs (NS4b and NS2) are less closely  
418 related than NS2 is to the host enzyme, AKAP7 (Fig. 2A & Table S1). Our results  
419 suggest that the main, and perhaps only, function of these activities is to degrade 2-5A  
420 thus preventing RNase L activation and viral escape, or in the case of AKAP7 reducing  
421 cell and tissue damage from RNase L activity. These 2',5'-PEs are also metal ion  
422 independent enzymes, as is RNase L (42).

423

424 The viral and mammalian 2',5'-PEs produce cleavage products from trimer 2-5A (2',5'-  
425 p<sub>3</sub>A<sub>3</sub>) with cyclic 2',3'-phosphoryl groups, and not 2',3'-OH termini. These conclusions  
426 are based on analysis of 2-5A cleavage products by two types of HPLC columns  
427 (Dionex and C18) and, importantly, by mass spectrometry. In contrast, our prior studies  
428 based on more limited analysis of the 2-5A cleavage products by one type of HPLC  
429 column (Dionex) misidentified these cleavage products of NS2, VP3-CTD, and AKAP7  
430 as AMP and ATP (22, 25, 27).

431

432 Interestingly, mammalian and viral 2',5'-PEs have activities highly similar to an  
433 invertebrate 2H-PE present in the oyster, *Crassostrea gigas* (43). The oyster enzyme

434 has sequence similarity to AKAP7, is metal ion independent, cleaves 2',5'- but not 3',5'-  
435 linked oligonucleotides, and leaves cyclic 2',3'-phosphate and 5'-OH termini on its  
436 products. It also degraded tri-phosphorylated 2-5A oligomers with multi-fold efficiency  
437 compared to the corresponding non-phosphorylated core 2-5A oligomers. Similarly, we  
438 observed RVA VP3-CTD degrades 5'-triphosphorylated-di-adenylate with 2',3' cyclic  
439 phosphoryl termini (p3ApA>p) preferentially compared to the non-phosphorylated di-  
440 adenylylate (ApA) core molecule (Figs. S3 & S4). However, the function and role of 2-5A  
441 cleaving enzymes in invertebrates is still unknown.

442

443 It is also unknown if the 2',3'-cyclic phosphates on 2-5A breakdown products generated  
444 by 2',5'-PEs have cell signaling functions. However, small self RNAs with 2',3'-cyclic  
445 phosphate termini (generated by RNase L) induced IFN- $\beta$  expression through RIG-I,  
446 MDA5, and MAVS (44). Additionally, RNase L-cleaved RNA with 2',3'-cyclic phosphates  
447 stimulated the NLRP3 inflammasome leading to IL-1 $\beta$  secretion (15). Also, during  
448 *Staphylococcus aureus* infections RNase T2 cleaves ssRNA producing purine-2',3'-  
449 cyclic phosphate terminated oligonucleotides sensed by TLR8 (45). The mammalian  
450 enzyme USB1, another 2H-PE, also produces 2',3'-phosphoryl termini during  
451 deadenylation of U6 snRNA, but it clearly differs from the 2',5'-PEs because it cleaves  
452 3',5'-phosphodiester bonds (21).

453

454 **2-5A catabolism during the IFN induced cellular responses to viral and host**  
455 **dsRNA.**

456

457 The ability of viruses to evade or antagonize the IFN response contributes to viral  
458 tropism and disease pathogenesis. Accordingly, viruses have evolved or acquired  
459 diverse strategies to overcome inhibition by type I and type III IFNs, both of which  
460 induce transcription of OAS genes (1, 2, 46). However, the precise cellular and  
461 molecular mechanisms by which viruses impede tissue specific host defenses leading  
462 to virus-induced pathology continue to be investigated. With regard to the OAS-RNase L  
463 pathway, it is the balance between 2-5A anabolic (OAS) and catabolic (e.g. 2',5'-PEs  
464 and PDE12) (20) activities that determine whether virus replication is blocked by RNase  
465 L. For instance, RNase L fails to inhibit coronaviruses MHV and MERS-CoV, or  
466 rotaviruses, unless there is an inactivating mutation of their 2-5A degrading enzymes  
467 (NS2, NS4b, and VP3, respectively) (22, 24-26). In contrast, SARS-CoV-2, which lacks  
468 a gene for a similar protein, is inhibited by RNase L (4). In this context, enzymes that  
469 degrade 2-5A, such as PDE12, are drug targets in the hunt for broad spectrum antiviral  
470 agents (32, 47).

471  
472 The viral enzymes NS2, NS4b and VP3-CTD are antagonists of innate immunity that  
473 support virus replication by eliminating 2-5A and preventing, or reducing, activation of  
474 RNase L by 2-5A (20, 22, 24-26). In contrast, mammalian AKAP7 is a nuclear 2',5'-PE  
475 that does not affect viral replication, unless its nuclear localization signal peptide is  
476 deleted leading to cytoplasmic accumulation (27). A mutant AKAP7 deleted for its N-  
477 terminal nuclear localization signal peptide accumulates in the cytoplasm was able to  
478 rescue an NS2 mutant of MHV (22). While the function of the 2',5'-oligonucleotide

479 cleaving activity of AKAP7 is still unresolved, the phylogenetic tree suggests that the  
480 NS2 coronavirus proteins may have evolved from the AKAP7 catalytic domain (Fig. 2A).  
481  
482 Enzymes that degrade 2-5A have significance beyond antiviral innate immunity. Self-  
483 dsRNA activates the OAS-RNase L pathway leading in some circumstances to  
484 apoptosis (12,13). In one example, mutation or inhibition of the dsRNA editing enzyme,  
485 ADAR1, leads to accumulation of self dsRNA activating OAS-RNase L leading to cell  
486 death, and PKR, inhibiting protein synthesis initiation (16, 48). In another instance,  
487 DNA methyltransferase inhibitors, e.g. 5-aza-cytidine, cause self-dsRNA accumulation  
488 from repetitive DNA elements leading to OAS-RNase L activation and apoptosis (17,  
489 49). Thus, 2-5A is a secondary messenger for cytotoxic and antiviral activities of either  
490 non-self (viral) or self-dsRNA (host) whose levels must be tightly controlled to limit  
491 cytotoxicity while restricting viral spread. Our findings provide a mechanistic  
492 understanding of how 2',5'-PEs regulate 2-5A levels among coronaviruses MHV,  
493 MERS-CoV, and group A rotaviruses and in mammalian cells through the activity of  
494 AKAP7 (22, 24, 25, 27), with implication for both control of virus replication and cellular  
495 responses to self-dsRNA. Furthermore, our study defines 2',5'-PEs as a new sub-group  
496 within the 2H-PE superfamily that shares characteristic conserved sequence features of  
497 the superfamily but with specific and distinct biochemical cleavage activities.  
498 Knowledge derived from the study of these 2-5A degrading enzymes could lead to  
499 future avenues of antiviral drug development.

500

## 501 MATERIAL AND METHODS

502

503 **cDNA cloning and plasmids.**

504 Human PDE12 cDNA was PCR amplified (using DNASU cDNA clone HsCD00296464

505 in vector pDONR221, GenBank: NM\_177966.5) with forward primer 5'-

506 TTCAAgaattcATGTGGAGGCTCCCAGGCGC-3' (with an EcoRI restriction site) and the

507 reverse primer 5'-

508 TTCAAgtcgacTCATTTCCATTTTAAATCACATACAAGTGCTATGTGATC-3' (with a Sall

509 restriction site). PDE12<sup>E351A</sup> pGEX 6P-1 mutant (34) plasmid was constructed by

510 MegaPrimer method (50) using mutagenic reverse primer 5'-

511 GCGCGGTCAACCGCCTGCAAACAG-3'. The amplified wild type and mutant PDE12

512 cDNAs were cloned into plasmid pGEX-6P-1 (GE Healthcare, USA) at the EcoRI and

513 Sall restriction site, sequenced and expressed in *E. coli* as glutathione *S*-transferase

514 (GST) fusion proteins. To subclone the VP3 C-terminal domain (CTD) cDNA of rotavirus

515 A strain RVA/Simian-tc/USA/RRV/1975/G3P (GenBank: EU636926.1) and its H718A

516 mutant, we used codon-optimized constructs for expression in Sf9 insect cells

517 (GenBank: KJ869109.1) (30) (gifts from Kristin Ogden, Vanderbilt University). The

518 cDNAs were PCR amplified and cloned into plasmid pMAL-C5X at the XmnI (blunt

519 cloned) and NcoI (sticky end) restriction site. Blunt end forward primer 5'-

520 TACGCTGACGACCCCAACTACTTCATCG-3' and reverse primer 5'-

521 TTCAAccatggTTATTACTCGGACATGTCTGAACACGGTGTCG-3' with NcoI restriction

522 site were used for VP3-CTD. The wild type and H718A RVA VP3-CTD proteins were

523 expressed fused to maltose binding protein (MBP). Additional protein expression

524 plasmid constructs were previously described with sequences originating from MERS-

525 CoV (MBP-NS4b and its mutant MBP-NS4b<sup>H182R</sup>) (24); from MHV (MBP-MHV NS2 and  
526 its mutant MBP-NS2<sup>H126R</sup>) (22), and mouse AKAP7 and its mutant AKAP7<sup>H93A; H185R</sup> (27).

527

## 528 **Protein expression and purification**

529 Proteins were expressed from pGEX-6P-1 or pMAL constructs in E. coli strain  
530 BL21(DE3)/pLysS (Life Technologies, USA). Wild type and catalytically inactive  
531 mutants of AKAP7 and PDE12 were expressed as GST-fusion proteins and purification  
532 was performed by modification of a previous protocol (51). Single colonies were used to  
533 inoculate primary cultures which were subsequently used to seed secondary cultures  
534 grown to 0.6 OD (600 nm) in a shaking incubator at 37°C and 250 rpm. Cells were  
535 induced with 0.2 mM IPTG, for 16 h at 22°C. Induced cell pellets were re-suspended in  
536 buffer A [20 mM HEPES pH 7.5, 1 M KCl, 1 mM EDTA, 10% glycerol v/v, 5 mM DTT  
537 and EDTA-free Pierce™ protease inhibitor (Thermo Scientific, USA)]. Pelleted cells were  
538 lysed by addition of 200 µg/ml lysozyme followed by sonication. Supernatants were  
539 collected after centrifugation at 12,000x g, 40 min, 4°C in a Beckman JA-17 rotor.  
540 Supernatants were added to Pierce™ Glutathione Agarose (Thermo scientific, USA)  
541 and incubated for 2 h at 4°C followed by washes with buffer A. Digestions to release the  
542 GST tag were performed with PreScission Protease (Cytiva, USA) in 50 mM Tris-HCL  
543 pH 7.5, 150 mM NaCl, 1 mM EDTA, and 1 mM DTT for 16 h at 4°C. Supernatants  
544 containing untagged protein were concentrated using Centriprep centrifugal filter  
545 devices (Millipore; molecular weight cutoff, 10 kDa) and loaded on superdex 75 column  
546 on an AKTA pure 25L protein purification system (GE Healthcare, USA) in 20 mM  
547 HEPES pH 7.5 150 mM NaCl, and 1 mM DTT. Wild type and mutant RVA VP3-CTD



548 expressing bacterial culture growth and IPTG induction conditions were same as  
549 described above, except that growth media additionally included 2% glucose. Harvested  
550 bacterial cell pellets were suspended in Buffer B [20 mM Tris-HCl pH 7.4 with 200 mM  
551 NaCl, 1mM EDTA, 10 mM  $\beta$ -mercaptoethanol, EDTA free protease inhibitor (Pierce™  
552 Protease inhibitor, Thermo Scientific, USA) and 10% glycerol] and lysed with lysozyme  
553 followed by sonication. Supernatants were incubated with Amylose resin (NEB, USA),  
554 washed three times with buffer followed by elution with 100 mM maltose. Proteins were  
555 concentrated using Centriprep centrifugal filter devices (Millipore; molecular weight  
556 cutoff, 10 kDa) and further purified using size exclusion chromatography (SEC) on an  
557 AKTA pure 25L protein purification system (GE Healthcare, USA) in buffer C (20 mM  
558 HEPES pH 7.5, 100 mM NaCl and 1 mM DTT). Wild type and catalytic mutants of  
559 NS4b, and MHV NS2 were purified as described previously (22, 24). In addition to  
560 inactive mutants, purified MBP protein was used as control in experiments with MBP  
561 fusion proteins. Protein concentrations were determined using Bio-Rad protein assay  
562 reagent (Bio-Rad, USA). All proteins were stored in Buffer C supplemented with 10%  
563 glycerol in -80°C.

564

565 **Synthesis and purification of 2-5A oligomers and other oligoribonucleotide**  
566 **substrates**

567 2-5A or  $p_35'A(2'p5'A)_2$  ( $2',5'-p_3A_3$ ) was synthesized from ATP by using histidine-tagged  
568 porcine-OAS1 (52). The OAS was immobilized and activated with poly(I):poly(C)-  
569 agarose (53). Briefly, poly(I):poly(C)-agarose beads were washed with buffer D [10 mM  
570 HEPES pH 7.5, 1.5 mM  $Mg(CH_3COO)_2 \cdot 4H_2O$ , 50 mM KCl, 20% glycerol, and 7 mM  $\beta$ -

571 mercaptoethanol]. Ten ml of beads were incubated with 10 mg of purified OAS protein  
572 for 2 h at 25°C with intermittent vortexing. Beads were washed three times with buffer D  
573 by centrifugation at 3000 g at 4°C for 30 min. Beads were suspended in the reaction  
574 mixtures containing 20 mM HEPES pH 7.5, 20 mM Mg(CH<sub>3</sub>COO)<sub>2</sub>·4H<sub>2</sub>O, 20 mM KCl, 1  
575 mM EDTA and 10 mM ATP. The reaction mixtures were incubated in a shaking  
576 incubator set at 37°C, 120 rpm for 18 h. The supernatant was collected by centrifugation  
577 at 3000 g at 4°C for 30 min. The supernatant was heated at 95°C for 5 min and again  
578 centrifuged at 18,000 g for 15 min at 4°C to remove the precipitate. To isolate individual  
579 2-5A oligomers, the supernatant containing crude, unfractionated 2-5A oligomers were  
580 run on an HPLC (1260 Infinity II Agilent technologies) equipped with a preparative  
581 Dionex column (BioLC<sup>R</sup>DNAPac<sup>R</sup>PA-100, 22 x 250 mm, Dionex, USA). Samples were  
582 injected and elution performed at a flow rate of 3 ml/min in a stepwise gradient of 10-  
583 400 mM (0-120 min), 400-800 mM (121-125 min) and 10 mM (126-160 min) of  
584 NH<sub>4</sub>HCO<sub>3</sub> buffer (pH 7.8). Fractions were collected, lyophilized and suspended in  
585 nuclease-free water.  
586  
587 RNA oligoribonucleotides (other than 2',5'-p<sub>3</sub>A<sub>3</sub>) with 2'-5' or 3'-5' phosphodiester  
588 linkages were commercially purchased. Oligonucleotide substrates 5'-  
589 pA2'p5'A2'p5'A2'p5'A2'p5'A -3', 5'-pU2'p5'U2'p5'U2'p5'U2'p5'U -3', 5'-  
590 pG2'p5'G2'p5'G2'p5'G2'p5'G -3', 5'-pA3'p5'A3'p5'A3'p5'A3'p5'A -3', 5'-  
591 pU3'p5'U3'p5'U3'p5'U3'p5'U -3' were purchased from Integrated DNA Technologies  
592 (IDT, USA) while 5'-pC2'p5'C2'p5'C2'p5'C2'p5'C -3', 5'-pC3'p5'C3'p5'C3'p5'C3'p5'C -3'  
593 and 5'-pA2'p5'A -3' were purchased from ChemGenes Corporation (Wilmington, USA).

594 Penta-ribonucleotides substrates are shown as p5'(rN)<sub>5</sub>, where N represents A, U, G, or  
595 C nucleotide. A2'p5'A standard was prepared by incubating 5'pA2'p5'A with shrimp  
596 alkaline phosphatase (ThermoFisher, USA) as per manufacturer's protocol. 2',3'-cyclic-  
597 GMP-AMP (cGAMP), ATP, AMP and adenosine were obtained from Sigma Aldrich,  
598 USA.

599

### 600 **Phosphodiesterase activity assays**

601 Ten  $\mu\text{M}$  of the substrates (with either 2'-5' or 3'-5' phosphodiester linkage) were  
602 incubated with 1  $\mu\text{M}$  of enzyme. Final reactions were performed in 20 mM HEPES  
603 buffer pH 7.4, 1 mM DTT and 10 mM  $\text{MgCl}_2$  by incubating at 30°C for 1 h (or for the  
604 time indicated in the text). Where indicated, reactions were performed in the absence of  
605  $\text{MgCl}_2$  with 2 mM EDTA added. Reactions were stopped by heating at 95°C for 5 min.  
606 Samples were centrifuged at 18,000 g for 15 min at 4 °C. Supernatants were collected  
607 and analyzed by HPLC. 2',3'-cGAMP degradation assays were performed and analyzed  
608 using the same conditions as described above. In all experiments, substrates incubated  
609 under similar conditions in the absence of enzyme served as control.

610

### 611 **HPLC analysis and identification of products**

612 The substrates and cleavage products were analyzed on a 1260 Infinity II Agilent  
613 technologies HPLC equipped with an Infinitylab Poroshell 120 C18 analytical column  
614 (Agilent technologies, 4.6 x 150 mm, 4 $\mu\text{m}$ ). Eluent A was 50 mM ammonium phosphate  
615 buffer pH 6.8 and eluent B was 50% methanol in water. Five  $\mu\text{l}$  of processed samples  
616 were injected on the C18 column, at a flow rate of 1 ml/min and eluted with a linear

617 gradient (0-40%) of eluent B over a period of 20 min, then 3 min 40% Eluent B, followed  
618 by equilibration to initial condition (100% Eluent A). The HPLC column was maintained  
619 at 40°C. Spectra were recorded at 256 nm. The products were identified either by  
620 comparing the elution time of known standards or by mass-spectrometry analysis.  
621 Alternatively, to test expanded substrate specificity, 10 µl of processed samples were  
622 injected on a Dionex DNAPac<sup>R</sup>PA-100 analytical column at a flow rate of 1 ml/min and  
623 eluted with a linear gradient of 10-800 mM of NH<sub>4</sub>HCO<sub>3</sub> buffer (pH 7.8) over a period of  
624 90 min, followed by 30 min equilibration to initial condition. Open Lab CDS software was  
625 used to analyze and calculate area under the peaks in HPLC spectra.

626

#### 627 **Shrimp Alkaline phosphatase (SAP) mediated phosphorylation analysis**

628 Purified substrates and cleavage product mixtures were dephosphorylated by  
629 incubating with SAP (ThermoFisher, USA) at 37°C for 1 h according to the  
630 manufacturer's protocol. Samples were prepared for subsequent analysis as described  
631 above.

632

#### 633 **Sample preparation for mass spectrometry**

634 Desired peak fractions (including cleavage products of 2',5'-p<sub>3</sub>A<sub>3</sub>) were collected by  
635 running samples on a Dionex DNAPac<sup>R</sup>PA-100 analytical column as described above.  
636 Collected peaks were subjected to acetone precipitation, supernatants containing  
637 cleavage products (from HPLC peak) were collected and lyophilized. Lyophilized  
638 samples were suspended in 1 mM NH<sub>4</sub>HCO<sub>3</sub> buffer (pH 7.8) and used for mass  
639 spectrometry analysis.

640

641 **Mass spectrometry analysis of cleavage products**

642 Prepared samples were subjected to mass spectrometry analysis. The LC/MS/MS  
643 analysis was carried out using a triple quadrupole tandem mass spectrometer (TSQ-  
644 Quantiva, Thermo Scientific, USA) equipped with an electrospray ionization (ESI)  
645 interface. The mass spectrometer was coupled to the outlet of HPLC system that  
646 consisted of an UHPLC system (Vanquish, Thermo Fisher Scientific, USA), including  
647 an auto sampler with refrigerated sample compartment and inline vacuum degasser.  
648 The Xcalibur software was used for data processing. The ESI mass spectrometric  
649 detection was performed in both the negative and positive ionizations, with ions spray  
650 voltage at 2.5kV, sheath gas at 35 Arb and Aux gas at 20 Arb. The ion transfer tube  
651 and vaporizer temperatures were set at 350°C and 250°C, respectively. The qualitative  
652 analysis was performed using full scan at the range from 200 to 1250 (m/z). Five µl  
653 extracted samples were injected on the C18 column (Gemini, 3 µm, 2 x 150 mm,  
654 Phenomenex, CA) with the flow rate of 0.3 ml/min at 45°C. Mobile phases were A  
655 (water containing 10 mM ammonium acetate and 20 mM ammonium hydroxide) and B  
656 (methanol containing 10 mM ammonium acetate and 20 mM ammonium hydroxide).  
657 Mobile phase B at 0% was used at 0-2 min, a linear gradient was used starting from 0%  
658 B to 100% B at 2-12 min, kept at 100% at 12-26 min, then from 100% B to 0% B at 26-  
659 27 min and kept at 0% B for 8 min. The peaks shown in full scans were processed to  
660 locate and identify the cleavage products of the 2',5'-p<sub>3</sub>A<sub>3</sub> substrate using the Xcalibur  
661 software v4.1. Standard adenosine, AMP, ATP and adenosine-2',3'-cyclic  
662 monophosphate sodium salt were run for reference.

663

## 664 **Bioinformatic Analysis**

665 The PDE domain sequences from different 2',5'-PEs were used for creating a multiple  
666 sequence alignment using MAFFT version 7 (54) employing iterative refinement method  
667 E-INS-I (<https://mafft.cbrc.jp/alignment/server/>). The MAFFT sequence alignment result  
668 was downloaded in clustal format and visualized using Jalview 2.11.1.3 software. The  
669 sequence alignment was further processed on MAFFT server to calculate the  
670 phylogenetic tree using neighbor joining method and JTT substitution model and then  
671 visualized tree using Archaeopteryx.js software. The resultant fasta format output of  
672 MAFFT multiple sequence alignment was used to calculate the percentage of amino  
673 acid identity and similarity by Sequence Identity and Similarity (SIAS) tool with default  
674 parameters (<http://imed.med.ucm.es/Tools/sias.html>). The name, accession number  
675 and amino acid (aa) region of the aligned sequences are MHV NS2 (UniProtKB/Swiss-  
676 Prot: P19738.1, aa 41-135), Human coronavirus (HCoV) OC43 NS2 (GenBank:  
677 AAT84352.1, aa 43-138), Human enteric coronavirus (HECoV) NS2 (GenBank:  
678 ACJ35484.1, aa 39-140), Equine coronavirus (ECoV) NS2 (GenBank: ABP87988.1, aa  
679 42-140), Middle East respiratory syndrome coronavirus (MERS-CoV) NS4b (GenBank:  
680 AFS88939.1, aa 87-191), Rat AKAP7  $\delta/\gamma$  (NCBI RefSeq: NP\_001001801.1, aa 121-  
681 233), Mouse AKAP7 isoform-1 (NCBI RefSeq: NP\_061217.3, aa 82-194), Human  
682 AKAP7  $\gamma$  (NCBI RefSeq: NP\_057461.2, aa 100-233), Human rotavirus group A (RVA)  
683 WA-VP3 (GenBank: AFR77808.1, aa 707-806), Simian rotavirus group A (RVA) SA11-  
684 N5 (GenBank: AFK09591.1, aa 707-808), Human rotavirus group B (RVB) Bang117  
685 (GenBank: ADF57896.1, aa 655-750), Bat coronavirus (BtCoV) SC2013 NS4b

686 (GenBank: AHY61340.1, aa 96-195) and Bat coronavirus (BtCoV) HKU5 NS4b (NCBI  
687 RefSeq: YP\_001039965.1, aa 91-192).

688

## 689 **AVAILABILITY**

690 Multiple sequence alignment software is available

691 (<https://mafft.cbrc.jp/alignment/server/>). Alignment and phylogenetic tree construction

692 tool is downloadable (<https://www.jalview.org/>). Sequence Identity and Similarity (SIAS)

693 tool with default parameters is available (<http://imed.med.ucm.es/Tools/sias.html>).

694

## 695 **ACCESSION NUMBERS**

696 The name and accession number of the aligned sequences are MHV NS2

697 (UniProtKB/Swiss-Prot: P19738.1), HCoV OC43 NS2 (GenBank: AAT84352.1), HCoV

698 NS2 (GenBank: ACJ35484.1), ECoV NS2 (GenBank: ABP87988.1), MERS-CoV NS4b

699 (GenBank: AFS88939.1), Rat AKAP7  $\delta/\gamma$  (NCBI RefSeq: NP\_001001801.1), Mouse

700 AKAP7 isoform-1 (NCBI RefSeq: NP\_061217.3), Human AKAP7  $\gamma$  (NCBI RefSeq:

701 NP\_057461.2), Human RVA WA VP3 (GenBank: AFR77808.1), Simian RVA SA11 N5

702 (GenBank: AFK09591.1), Human RVB Bang117 (GenBank: ADF57896.1), BtCoV

703 SC2013 NS4b (GenBank: AHY61340.1) and BtCoV HKU5 NS4b (NCBI RefSeq:

704 YP\_001039965.1).

705

## 706 **ACKNOWLEDGEMENTS**

707 We thank Dr. Renliang Zhang of Mass Spectrometry Core, Lerner Research Institute,

708 Cleveland Clinic for performing LC/MS/MS and to Kristin Ogden (Vanderbilt University)

709 for the rotavirus VP3-CTD cDNAs, and we thank Babal Kant Jha (Cleveland Clinic),  
710 Harpreet Kaur (Cleveland Clinic), Nikhil Bharambe (Case Western Reserve University)  
711 and Stephen A. Goldstein (University of Utah) for discussions.

712

### 713 **FUNDING**

714 We wish to acknowledge support by the National Institute of Allergy and Infectious  
715 Diseases of the National Institutes of Health under Awards [R01AI104887 to S.R.W.  
716 and R.H.S., AI140442 to S.R.W., and R01AI135922 to R.H.S.]

717

### 718 **CONFLICT OF INTEREST**

719 R.H.S. is a consultant to Inception Therapeutics, Inc., S.R.W. is on the scientific  
720 advisory board of Immunome, Inc and Ocugen, Inc.

721

### 722 **FIGURE LEGENDS**

723

724 **Figure 1. Interplay between cellular responses to viral and host dsRNA, the OAS-**  
725 **RNase L pathway, and antagonism by 2-5A degrading enzymes. (A) OASs(1-3) are**  
726 **IFN induced dsRNA sensors, once activated they synthesize the antiviral substance**  
727 **2',5'-oligoadenylates (2-5A) from ATP. 2-5A binds inactive monomeric RNase L**  
728 **inducing active RNase L dimers, which in turn degrade viral and host single-stranded**  
729 **RNAs. The balance between 2-5A accumulation by OAS enzymes and its degradation**  
730 **by host and viral enzymes determines cell and virus fate and inflammatory responses.**  
731 **(B) Domain structure of viral and cellular 2',5'-PEs and human PDE12 (an**  
732 **endonuclease/exonuclease/phosphatase (EEP) family member). Features of full length**



733 MERS-CoV NS4b, MHV NS2, RVA SA11 VP3 and *M. musculus* AKAP7 $\gamma$  proteins  
734 including a nuclear localization sequence (NLS) and catalytic 2',5'-PE domains are  
735 compared, modified from ref. (24). Position of conserved histidines within the catalytic  
736 domain of 2',5'-PEs are shown. PKA-RII- $\alpha$ -BD, a binding domain for regulatory subunit  
737 (RII) of cAMP-dependent protein kinase A (27), guanylyltransferase (Gtase), and  
738 methyltransferase (Mtase) domains are also shown (25, 29). The mitochondrial-matrix  
739 targeting peptide (MTP) and the catalytic EEP domain of PDE12 is shown (55).  
740 Domains shown are not drawn to scale.

741

742 **Figure 2. Phylogenetic relationship and sequence alignment of 2',5'-PEs. (A)**

743 Phylogenetic tree based on amino acids from catalytic domains of 2',5'-PEs is  
744 shown. The numbers represents branch length. (B) Sequence alignment of amino acids  
745 spanning the catalytic domain of 2',5'-PEs using MAFFT multiple sequence alignment  
746 program is shown. Catalytic motifs [H- $\Phi$ -(S/T)- $\Phi$ ] are indicated above the boxes, where  
747  $\Phi$  represents a hydrophobic residue. Numbers represent the start and end of the amino  
748 acid sequences used for sequence alignment. Aligned residues are color-coded for  
749 conservation according to the CLUSTAL X scheme. Hydrophobic, blue; positive charge,  
750 red; negative charge, magenta; polar, green; glycine, orange; proline, yellow; aromatic,  
751 cyan; unconserved, white. Hu, human; Mu, mouse; HE, human enteric; E, equine; Bt,  
752 bat; CoV, coronavirus; RVA, rotavirus group A; RVB, rotavirus group B.

753

754 **Figure 3. Specific cleavage of trimer 2-5A (2',5'-p<sub>3</sub>A<sub>3</sub>) by viral and cellular 2',5'-**

755 **PEs. HPLC analysis of (A) intact 2',5'-p<sub>3</sub>A<sub>3</sub>, followed by its cleavage with either viral**

756 2',5'-PEs (B) MERS-NS4b, (C) MHV NS2, (D) RVA VP3-CTD or a host 2',5'-PE (E)  
757 muAKAP7 or (F) human PDE12. Purified 2',5'-p<sub>3</sub>A<sub>3</sub> (200 μM) was incubated with 1 μM of  
758 indicated proteins at 30°C for 1 h. HPLC analysis of catalytically inactive mutants of  
759 these enzymes incubated with 2',5'-p<sub>3</sub>A<sub>3</sub> under similar conditions is shown for (G)  
760 MERS-NS4b<sup>H182R</sup> (H) MHV NS2<sup>H126R</sup> (I) RVA VP3-CTD<sup>H718A</sup> (J) muAKAP7<sup>H93A; H185R</sup> and  
761 (K) human PDE12<sup>E351A</sup>. Experiments performed at least three times produced a similar  
762 2',5'-p<sub>3</sub>A<sub>3</sub> degradation pattern for each 2',5'-PEs. Arrows indicate elution times of the  
763 standards ATP, AMP, and adenosine (Ado). Peaks shown in grey were determined from  
764 experiments done in figures 5 and 6.

765

766 **Figure 4. Influence of Mg<sup>2+</sup> ions on degradation of 2',5'-p<sub>3</sub>A<sub>3</sub> by 2',5'-PEs.** Purified  
767 2',5'-p<sub>3</sub>A<sub>3</sub> was incubated with indicated 2',5'-PEs in time-course experiments. Data was  
768 obtained by incubating 2',5'-p<sub>3</sub>A<sub>3</sub> (200 μM) with (A) MERS-NS4b (1 μM), (B) MHV NS2 (1  
769 μM), (C) RVA VP3-CTD (0.05 μM) and (D) muAKAP7 (1 μM) at 30°C. Samples were  
770 collected at 1, 2, 5, 10, 20 and 30 min and reactions were stopped. The percent of  
771 uncleaved 2',5'-p<sub>3</sub>A<sub>3</sub> remaining at indicated times were determined by calculating the  
772 area under the peaks on the HPLC chromatograms. (E) The table shows the specific  
773 activity of 2',5'-PEs in the absence and presence of 10 mM MgCl<sub>2</sub>. Activity is expressed  
774 as the amount of products released from the substrate in nMol per min per mg of the  
775 protein at 30°C during 5 min reaction time. Experiments were performed in triplicate (n =  
776 3) and the standard error of mean was calculated.

777

778 **Figure 5. MERS-NS4b cleaves 2',5'-p<sub>3</sub>A<sub>3</sub> and catalyzes the formation of 2',3' cyclic**  
779 **phosphate products.** (A) Schematic illustration of the strategy to identify the cleavage  
780 mechanism and degradation products of 2',5'-p<sub>3</sub>A<sub>3</sub> by MERS-NS4b. (B) Chromatogram  
781 of partially degraded 2',5'-p<sub>3</sub>A<sub>3</sub> and cleavage products formed by MERS-NS4b. 200 μM  
782 of 2',5'-p<sub>3</sub>A<sub>3</sub> was incubated with 1 μM of MERS-NS4b at 30°C for 10 min. (C) HPLC  
783 chromatogram of the collected peak (corresponds to ApA). (D) HPLC chromatogram of  
784 the collected peak (corresponds to p<sub>3</sub>A>p). (E) HPLC analysis of the dephosphorylated  
785 product (A>p) of peak collected in figure 5D (p<sub>3</sub>A>p). (F) Schematic illustration showing  
786 shrimp alkaline phosphatase (SAP) mediated p<sub>3</sub>A>p dephosphorylation at 5' end forms  
787 A>p. (G) Expected masses of potential 2',5'-p<sub>3</sub>A<sub>3</sub> degradation products containing 3'OH,  
788 2'p or 2',3'>p groups. Box shows masses of actual cleavage products identified by mass  
789 spectrometry. Mass spectrometry analysis showing m/z of (H) ApA → peak fraction  
790 collected in C, (I) p<sub>3</sub>A>p → peak collected in D and (J) intact 2',5'-p<sub>3</sub>A<sub>3</sub>. m/z is the mass-  
791 charge ratio. Peaks shown in grey were identified in the subsequent experiments.

792

793 **Figure 6. 2',5'-p<sub>3</sub>A<sub>3</sub> cleavage by RVA VP3-CTD proceeds via formation of p<sub>3</sub>ApA>p**  
794 **and ApA intermediates.** (A) Schematic illustration of the strategy to identify the  
795 cleavage mechanism, intermediates and end products of 2',5'-p<sub>3</sub>A<sub>3</sub> cleavage by RVA  
796 VP3-CTD. (B) Chromatogram of intact p<sub>3</sub>A<sub>3</sub>. (C) HPLC chromatogram of cleavage  
797 products formed by degradation of 200 μM 2',5'-p<sub>3</sub>A<sub>3</sub> incubated with 0.05 μM of RVA  
798 VP3-CTD for 20 min at 30°C. Peaks identified based on elution times of known  
799 standards are marked. (D) HPLC analysis of the dephosphorylated products from the  
800 reaction in figure 6C. Shrimp alkaline phosphatase (SAP) treatment dephosphorylate 5'-

801 phosphates. The peaks indicated were collected and identified by LC/MS/MS analysis.  
802 (E) Schematic illustration showing dephosphorylation of potential intermediates at 5'  
803 end using SAP. Mass spectrometry analysis showing m/z of (F) A>p and (G) ApA>p.  
804 m/z is the mass-charge ratio. Peaks shown in grey were identified in the subsequent  
805 experiments.

806

807 **Figure 7. Mechanism of 2'-5'-p<sub>3</sub>A<sub>3</sub> degradation by 2',5'-PEs (a subfamily of 2H-PEs**  
808 **superfamily) and EEP (endonuclease/exonuclease/phosphatase) family.** MERS-  
809 CoV NS4b, MHV-CoV NS2, RVA VP3, and mammalian mouse AKAP7 from the 2',5'-PE  
810 subfamily cleave 2',5'-p<sub>3</sub>A<sub>3</sub> and leaves 2',3' >p groups on the 5'-products. While human  
811 PDE12, an EEP family member degrades 2',5'-p<sub>3</sub>A<sub>3</sub> to yield ATP and AMP.

812

### 813 SUPPLEMENTARY FIGURES AND TABLES

814 **Figure S1. 2',5'-p(A)<sub>5</sub> degradation by MHV NS2 decreases in the presence of 2',5'-**  
815 **p(U)<sub>5</sub>.** Substrate 2',5'-p(A)<sub>5</sub> was incubated with 0.2 mM of MHV-NS2 wild type protein in  
816 the absence or presence of indicated concentration of 2',5'-p(U)<sub>5</sub> at 30°C for 10 min.  
817 Samples were processed and analyzed by HPLC. 2',5'-p(A)<sub>5</sub> incubated under similar  
818 conditions in the absence of MHV-NS2 and 2',5'-p(U)<sub>5</sub> served as non-degraded control.  
819 Experiments were performed three times (n=3) and bars represent the standard error of  
820 mean. Statistical significance was calculated using unpaired t test (n=3; \*, P value <  
821 0.05; \*\*, P < 0.005;\*\*\*, P < 0.001; ns, not significant) in GraphPad Prism (9.0.0)  
822 software.

823

824 **Figure S2. MERS-NS4b degrades 2',5'-p<sub>3</sub>A<sub>3</sub> but not 2',5' linked ApA or pApA.**

825 Substrate 2',5'-p<sub>3</sub>A<sub>3</sub> (A) was degraded in the presence of NS4b into p<sub>3</sub>A>p and ApA (B).

826 Panels B, C, and D showed no appreciable decrease in amounts of ApA (area under

827 the peak) after incubation for 1, 4 and 24 h, respectively. Panels E, F, G and H shows

828 HPLC chromatograms of substrate pApA in the presence for NS4b at 0, 1, 4 and 24 h.

829 (I) The table shows the amount of ApA or pApA degraded by NS4b as a function of

830 time.

831

832 **Figure S3. Time-course of 2',5'-p<sub>3</sub>A<sub>3</sub> cleavage by RVA VP3-CTD.** Purified 2',5'-p<sub>3</sub>A<sub>3</sub>

833 (200 μM) was incubated with RVA VP3-CTD (0.05 μM) at 30°C. Samples were collected

834 at (A) 0 min, (B) 2 min, (C) 5 min, (D) 10 min, and (E) 30 min and analyzed by HPLC.

835 The percent of substrate or products at indicated times were determined by calculating

836 the area under the peaks on the HPLC chromatograms. Right hand side shows major

837 and minor reactions proceeding at the indicated time points deduced from HPLC

838 chromatogram analysis.

839

840 **Figure S4. Mechanism of 2',5'-p<sub>3</sub>A<sub>3</sub> cleavage by RVA VP3-CTD.** (A) The percentage

841 of the substrate or the products at indicated times were determined by calculating the

842 area under the peaks on the HPLC chromatograms obtained in experiment from figure

843 S3. (B) Summary of major and minor reactions involved in cleavage of 2',5'-p<sub>3</sub>A<sub>3</sub> by

844 VP3-CTD. The minor reaction cleavage of ApA to A>p and Ado is inferred from

845 incubations performed at a 20-fold higher concentration of RVA VP3-CTD, 1 mM (Fig.  
846 3D).

847

848 **Figure S5. RVA VP3-CTD degrades 2',5' linked di-adenylate.** (A) Substrate 2',5'-  
849 pApA (A) was incubated with 1 mM of either (B) wild type RVA VP3-CTD or its mutant  
850 (C) RVA VP3 CTDH<sup>718A</sup> at 30°C for 1 h. Samples were processed and analyzed by  
851 HPLC. Baseline buffer signal was subtracted from the samples.

852

853 **Figure S6. Time-course of 2',5'-p<sub>3</sub>A<sub>3</sub> cleavage by muAKAP7.** Purified 2',5'-p<sub>3</sub>A<sub>3</sub> (200  
854 μM) was incubated with muAKAP7 (1 μM) at 30°C. Samples were collected at (A) 0  
855 min, (B) 2 min, (C) 10 min, (D) 30 min and (E) 60 min and analyzed by HPLC. The  
856 peaks were identified by comparing the elution time of known standards. The percent of  
857 substrate or products at indicated times were determined by calculating the area under  
858 the peaks on the HPLC chromatograms. (F) Schematics showing cleavage of 2',5'-p<sub>3</sub>A<sub>3</sub>  
859 by muAKAP7. Reaction intermediate is shown in grey color.

860

861 **Table S1. Catalytic domain sequence identity and similarity analysis of viral and**  
862 **cellular 2',5'-PEs.** Percent amino acid identity and similarity matrix is based on  
863 alignment in figure 2B. 2',5'-PEs from mammals or mammalian viruses were used for  
864 alignment. Values are calculated using Sequence Identity and Similarity (SIAS) tool.  
865 Matrix values show percent identity (above diagonal) and similarity (below diagonal)

866 between the corresponding pair of the proteins. Intragroup identity and similarity values  
867 are shaded in grey.

868

869 **Table S2. MERS-NS4b, MHV NS2, RVA VP3-CTD and muAKAP7 mediated**  
870 **degradation of 5'-phosphorylated, 2'-5' or 3'-5' linked penta-ribonucleotide**  
871 **substrates.** Ten  $\mu\text{M}$  of the indicated substrate was incubated with 1  $\mu\text{M}$  of wild type or  
872 mutant 2',5'-PE for 1 h at 30°C. Percent substrate degradation was calculated by  
873 measuring the area under the peaks in the HPLC chromatograms. Results were  
874 reproduced in at least two independent experiments.

875

876 **Table S3. MERS-NS4b mediated degradation of 5'-phosphorylated 2'-5' or 3'-5'**  
877 **linked penta-ribonucleotide substrates.** Ten  $\mu\text{M}$  of the indicated substrate was  
878 incubated with 3  $\mu\text{M}$  of wild type or mutant MERS-NS4b for 1 h at 30°C. Percent  
879 substrate degradation was calculated by measuring the area under the peaks in the  
880 HPLC chromatograms. Results were reproduced in two independent experiments.

881

882 **Table S4. 2',5'-PEs mediated degradation of 2',3'-cGAMP and 2',5'-p<sub>3</sub>A<sub>3</sub>.** Ten  $\mu\text{M}$  of  
883 the indicated substrate was incubated with 1  $\mu\text{M}$  of wild type or mutant 2',5'-PEs for 1 h  
884 at 30°C. Substrate without enzyme incubated under similar condition were used as un-  
885 degraded control. Percent substrate degradation was calculated by measuring the area  
886 under the peaks in the HPLC chromatograms. Results were reproduced in two  
887 independent experiments.

888

889



890 **REFERENCES**

891

- 892 1. Borden EC, Sen GC, Uze G, Silverman RH, Ransohoff RM, Foster GR, Stark  
893 GR. 2007. Interferons at age 50: past, current and future impact on biomedicine.  
894 Nat Rev Drug Discov 6:975-90.
- 895 2. Samuel CE. 2001. Antiviral actions of interferons. Clin Microbiol Rev 14:778-809,  
896 table of contents.
- 897 3. Weiss SR. 2020. Forty years with coronaviruses. J Exp Med 217.
- 898 4. Li Y, Renner DM, Comar CE, Whelan JN, Reyes HM, Cardenas-Diaz FL, Truitt  
899 R, Tan LH, Dong B, Alysandratos KD, Huang J, Palmer JN, Adappa ND,  
900 Kohanski MA, Kotton DN, Silverman RH, Yang W, Morrissey E, Cohen NA, Weiss  
901 SR. 2020. SARS-CoV-2 induces double-stranded RNA-mediated innate immune  
902 responses in respiratory epithelial derived cells and cardiomyocytes. Proc Natl  
903 Acad Sci U S A (in press) DOI: 10.1073/pnas.2022643118.
- 904 5. Der SD, Zhou A, Williams BR, Silverman RH. 1998. Identification of genes  
905 differentially regulated by interferon alpha, beta, or gamma using oligonucleotide  
906 arrays. Proc Natl Acad Sci U S A 95:15623-8.
- 907 6. Hovanessian AG, Brown RE, Kerr IM. 1977. Synthesis of low molecular weight  
908 inhibitor of protein synthesis with enzyme from interferon-treated cells. Nature  
909 268:537-40.
- 910 7. Kerr IM, Brown RE. 1978. pppA2'p5'A2'p5'A: an inhibitor of protein synthesis  
911 synthesized with an enzyme fraction from interferon-treated cells. Proc Natl Acad  
912 Sci U S A 75:256-60.
- 913 8. Kristiansen H, Gad HH, Eskildsen-Larsen S, Despres P, Hartmann R. 2011. The  
914 oligoadenylate synthetase family: an ancient protein family with multiple antiviral  
915 activities. J Interferon Cytokine Res 31:41-7.
- 916 9. Kakuta S, Shibata S, Iwakura Y. 2002. Genomic structure of the mouse 2',5'-  
917 oligoadenylate synthetase gene family. J Interferon Cytokine Res 22:981-93.
- 918 10. Li Y, Dong B, Wei Z, Silverman RH, Weiss SR. 2019. Activation of RNase L in  
919 Egyptian Roussette Bat-Derived RoNi/7 Cells Is Dependent Primarily on OAS3  
920 and Independent of MAVS Signaling. mBio 10.
- 921 11. Clemens MJ, Williams BR. 1978. Inhibition of cell-free protein synthesis by  
922 pppA2'p5'A2'p5'A: a novel oligonucleotide synthesized by interferon-treated L cell  
923 extracts. Cell 13:565-72.
- 924 12. Zhou A, Hassel BA, Silverman RH. 1993. Expression cloning of 2-5A-dependent  
925 RNAase: a uniquely regulated mediator of interferon action. Cell 72:753-65.
- 926 13. Castelli JC, Hassel BA, Wood KA, Li XL, Amemiya K, Dalakas MC, Torrence PF,  
927 Youle RJ. 1997. A study of the interferon antiviral mechanism: apoptosis  
928 activation by the 2-5A system. J Exp Med 186:967-72.
- 929 14. Zhou A, Paranjape J, Brown TL, Nie H, Naik S, Dong B, Chang A, Trapp B,  
930 Fairchild R, Colmenares C, Silverman RH. 1997. Interferon action and apoptosis  
931 are defective in mice devoid of 2',5'-oligoadenylate-dependent RNase L. EMBO J  
932 16:6355-63.

- 933 15. Chakrabarti A, Banerjee S, Franchi L, Loo YM, Gale M, Jr., Nunez G, Silverman  
934 RH. 2015. RNase L activates the NLRP3 inflammasome during viral infections.  
935 *Cell Host Microbe* 17:466-77.
- 936 16. Li Y, Banerjee S, Goldstein SA, Dong B, Gaughan C, Rath S, Donovan J,  
937 Korennykh A, Silverman RH, Weiss SR. 2017. Ribonuclease L mediates the cell-  
938 lethal phenotype of double-stranded RNA editing enzyme ADAR1 deficiency in a  
939 human cell line. *Elife* 6.
- 940 17. Banerjee S, Gusho E, Gaughan C, Dong B, Gu X, Holvey-Bates E, Talukdar M,  
941 Li Y, Weiss SR, Sicheri F, Sauntharajah Y, Stark GR, Silverman RH. 2019.  
942 OAS-RNase L innate immune pathway mediates the cytotoxicity of a DNA-  
943 demethylating drug. *Proc Natl Acad Sci U S A* 116:5071-5076.
- 944 18. Mehdi-pour P, Marhon SA, Ettayebi I, Chakravarthy A, Hosseini A, Wang Y, de  
945 Castro FA, Loo Yau H, Ishak C, Abelson S, O'Brien CA, De Carvalho DD. 2020.  
946 Epigenetic therapy induces transcription of inverted SINES and ADAR1  
947 dependency. *Nature* 588:169-173.
- 948 19. Mazumder R, Iyer LM, Vasudevan S, Aravind L. 2002. Detection of novel  
949 members, structure-function analysis and evolutionary classification of the 2H  
950 phosphoesterase superfamily. *Nucleic Acids Res* 30:5229-43.
- 951 20. Silverman RH, Weiss SR. 2014. Viral phosphodiesterases that antagonize  
952 double-stranded RNA signaling to RNase L by degrading 2-5A. *J Interferon*  
953 *Cytokine Res* 34:455-63.
- 954 21. Nomura Y, Roston D, Montemayor EJ, Cui Q, Butcher SE. 2018. Structural and  
955 mechanistic basis for preferential deadenylation of U6 snRNA by Usb1. *Nucleic*  
956 *Acids Res* 46:11488-11501.
- 957 22. Zhao L, Jha BK, Wu A, Elliott R, Ziebuhr J, Gorbalenya AE, Silverman RH, Weiss  
958 SR. 2012. Antagonism of the interferon-induced OAS-RNase L pathway by  
959 murine coronavirus ns2 protein is required for virus replication and liver  
960 pathology. *Cell Host Microbe* 11:607-16.
- 961 23. Goldstein SA, Thornbrough JM, Zhang R, Jha BK, Li Y, Elliott R, Quiroz-Figueroa  
962 K, Chen AI, Silverman RH, Weiss SR. 2017. Lineage A Betacoronavirus NS2  
963 Proteins and the Homologous Torovirus Berne pp1a Carboxy-Terminal Domain  
964 Are Phosphodiesterases That Antagonize Activation of RNase L. *J Virol* 91.
- 965 24. Thornbrough JM, Jha BK, Yount B, Goldstein SA, Li Y, Elliott R, Sims AC, Baric  
966 RS, Silverman RH, Weiss SR. 2016. Middle East Respiratory Syndrome  
967 Coronavirus NS4b Protein Inhibits Host RNase L Activation. *mBio* 7:e00258.
- 968 25. Zhang R, Jha BK, Ogden KM, Dong B, Zhao L, Elliott R, Patton JT, Silverman  
969 RH, Weiss SR. 2013. Homologous 2',5'-phosphodiesterases from disparate RNA  
970 viruses antagonize antiviral innate immunity. *Proc Natl Acad Sci U S A*  
971 110:13114-9.
- 972 26. Song Y, Feng N, Sanchez-Tacuba L, Yasukawa LL, Ren L, Silverman RH, Ding  
973 S, Greenberg HB. 2020. Reverse Genetics Reveals a Role of Rotavirus VP3  
974 Phosphodiesterase Activity in Inhibiting RNase L Signaling and Contributing to  
975 Intestinal Viral Replication In Vivo. *J Virol* 94.
- 976 27. Gusho E, Zhang R, Jha BK, Thornbrough JM, Dong B, Gaughan C, Elliott R,  
977 Weiss SR, Silverman RH. 2014. Murine AKAP7 has a 2',5'-phosphodiesterase

- 978 domain that can complement an inactive murine coronavirus ns2 gene. *mBio*  
979 5:e01312-14.
- 980 28. Canton J, Fehr AR, Fernandez-Delgado R, Gutierrez-Alvarez FJ, Sanchez-  
981 Aparicio MT, Garcia-Sastre A, Perlman S, Enjuanes L, Sola I. 2018. MERS-CoV  
982 4b protein interferes with the NF-kappaB-dependent innate immune response  
983 during infection. *PLoS Pathog* 14:e1006838.
- 984 29. Chen D, Luongo CL, Nibert ML, Patton JT. 1999. Rotavirus open cores catalyze  
985 5'-capping and methylation of exogenous RNA: evidence that VP3 is a  
986 methyltransferase. *Virology* 265:120-30.
- 987 30. Ogden KM, Snyder MJ, Dennis AF, Patton JT. 2014. Predicted structure and  
988 domain organization of rotavirus capping enzyme and innate immune antagonist  
989 VP3. *J Virol* 88:9072-85.
- 990 31. Kindler E, Trojnar E, Heckel G, Otto PH, Johne R. 2013. Analysis of rotavirus  
991 species diversity and evolution including the newly determined full-length  
992 genome sequences of rotavirus F and G. *Infect Genet Evol* 14:58-67.
- 993 32. Kubota K, Nakahara K, Ohtsuka T, Yoshida S, Kawaguchi J, Fujita Y, Ozeki Y,  
994 Hara A, Yoshimura C, Furukawa H, Haruyama H, Ichikawa K, Yamashita M,  
995 Matsuoka T, Iijima Y. 2004. Identification of 2'-phosphodiesterase, which plays a  
996 role in the 2-5A system regulated by interferon. *J Biol Chem* 279:37832-41.
- 997 33. Poulsen JB, Andersen KR, Kjaer KH, Vestergaard AL, Justesen J, Martensen  
998 PM. 2012. Characterization of human phosphodiesterase 12 and identification of  
999 a novel 2'-5' oligoadenylate nuclease - The ectonucleotide  
1000 pyrophosphatase/phosphodiesterase 1. *Biochimie* 94:1098-107.
- 1001 34. Rorbach J, Nicholls TJ, Minczuk M. 2011. PDE12 removes mitochondrial RNA  
1002 poly(A) tails and controls translation in human mitochondria. *Nucleic Acids Res*  
1003 39:7750-63.
- 1004 35. Hopfner KP, Hornung V. 2020. Molecular mechanisms and cellular functions of  
1005 cGAS-STING signalling. *Nat Rev Mol Cell Biol* 21:501-521.
- 1006 36. Romani AM. 2011. Cellular magnesium homeostasis. *Arch Biochem Biophys*  
1007 512:1-23.
- 1008 37. Dong B, Xu L, Zhou A, Hassel BA, Lee X, Torrence PF, Silverman RH. 1994.  
1009 Intrinsic molecular activities of the interferon-induced 2-5A-dependent RNase. *J*  
1010 *Biol Chem* 269:14153-8.
- 1011 38. Kondratova AA, Cheon H, Dong B, Holvey-Bates EG, Hasipek M, Taran I,  
1012 Gaughan C, Jha BK, Silverman RH, Stark GR. 2020. Suppressing PARylation by  
1013 2',5'-oligoadenylate synthetase 1 inhibits DNA damage-induced cell death.  
1014 *EMBO J* 39:e101573.
- 1015 39. Ferbus D, Justesen J, Besancon F, Thang MN. 1981. The 2'5' oligoadenylate  
1016 synthetase has a multifunctional 2'5' nucleotidyl-transferase activity. *Biochem*  
1017 *Biophys Res Commun* 100:847-56.
- 1018 40. Justesen J, Hartmann R, Kjeldgaard NO. 2000. Gene structure and function of  
1019 the 2'-5'-oligoadenylate synthetase family. *Cell Mol Life Sci* 57:1593-612.
- 1020 41. Cayley PJ, Kerr IM. 1982. Synthesis, characterisation and biological significance  
1021 of (2'-5')oligoadenylate derivatives of NAD<sup>+</sup>, ADP-ribose and  
1022 adenosine(5')tetraphospho(5')adenosine. *Eur J Biochem* 122:601-8.

- 1023 42. Cooper DA, Jha BK, Silverman RH, Hesselberth JR, Barton DJ. 2014.  
1024 Ribonuclease L and metal-ion-independent endoribonuclease cleavage sites in  
1025 host and viral RNAs. *Nucleic Acids Res* 42:5202-16.
- 1026 43. Lopp A, Reintamm T, Kuusksalu A, Olsper A, Kelve M. 2019. Identification of a  
1027 novel member of 2H phosphoesterases, 2',5'-oligoadenylate degrading  
1028 ribonuclease from the oyster *Crassostrea gigas*. *Biochimie* 156:181-195.
- 1029 44. Malathi K, Dong B, Gale M, Jr., Silverman RH. 2007. Small self-RNA generated  
1030 by RNase L amplifies antiviral innate immunity. *Nature* 448:816-9.
- 1031 45. Greulich W, Wagner M, Gaidt MM, Stafford C, Cheng Y, Linder A, Carell T,  
1032 Hornung V. 2019. TLR8 Is a Sensor of RNase T2 Degradation Products. *Cell*  
1033 179:1264-1275 e13.
- 1034 46. Garcia-Sastre A. 2017. Ten Strategies of Interferon Evasion by Viruses. *Cell*  
1035 *Host Microbe* 22:176-184.
- 1036 47. Wood ER, Bledsoe R, Chai J, Daka P, Deng H, Ding Y, Harris-Gurley S, Kryn  
1037 LH, Nartey E, Nichols J, Nolte RT, Prabhu N, Rise C, Sheahan T, Shotwell JB,  
1038 Smith D, Tai V, Taylor JD, Tomberlin G, Wang L, Wisely B, You S, Xia B,  
1039 Dickson H. 2015. The Role of Phosphodiesterase 12 (PDE12) as a Negative  
1040 Regulator of the Innate Immune Response and the Discovery of Antiviral  
1041 Inhibitors. *J Biol Chem* 290:19681-96.
- 1042 48. Chung H, Calis JJA, Wu X, Sun T, Yu Y, Sarbanes SL, Dao Thi VL, Shilvock AR,  
1043 Hoffmann HH, Rosenberg BR, Rice CM. 2018. Human ADAR1 Prevents  
1044 Endogenous RNA from Triggering Translational Shutdown. *Cell* 172:811-824  
1045 e14.
- 1046 49. Leonova KI, Brodsky L, Lipchick B, Pal M, Novototskaya L, Chenchik AA, Sen  
1047 GC, Komarova EA, Gudkov AV. 2013. p53 cooperates with DNA methylation and  
1048 a suicidal interferon response to maintain epigenetic silencing of repeats and  
1049 noncoding RNAs. *Proc Natl Acad Sci U S A* 110:E89-98.
- 1050 50. Tyagi R, Lai R, Duggleby RG. 2004. A new approach to 'megaprimer'  
1051 polymerase chain reaction mutagenesis without an intermediate gel purification  
1052 step. *BMC Biotechnol* 4:2.
- 1053 51. Estrella MA, Du J, Korennykh A. 2018. Crystal Structure of Human Nocturnin  
1054 Catalytic Domain. *Sci Rep* 8:16294.
- 1055 52. Hartmann R, Justesen J, Sarkar SN, Sen GC, Yee VC. 2003. Crystal structure of  
1056 the 2'-specific and double-stranded RNA-activated interferon-induced antiviral  
1057 protein 2'-5'-oligoadenylate synthetase. *Mol Cell* 12:1173-85.
- 1058 53. Rusch L, Dong B, Silverman RH. 2001. Monitoring activation of ribonuclease L  
1059 by 2',5'-oligoadenylates using purified recombinant enzyme and intact malignant  
1060 glioma cells. *Methods Enzymol* 342:10-20.
- 1061 54. Katoh K, Standley DM. 2013. MAFFT multiple sequence alignment software  
1062 version 7: improvements in performance and usability. *Mol Biol Evol* 30:772-80.
- 1063 55. Poulsen JB, Andersen KR, Kjaer KH, Durand F, Faou P, Vestergaard AL, Talbo  
1064 GH, Hoogenraad N, Brodersen DE, Justesen J, Martensen PM. 2011. Human 2'-  
1065 phosphodiesterase localizes to the mitochondrial matrix with a putative function  
1066 in mitochondrial RNA turnover. *Nucleic Acids Res* 39:3754-70.
- 1067

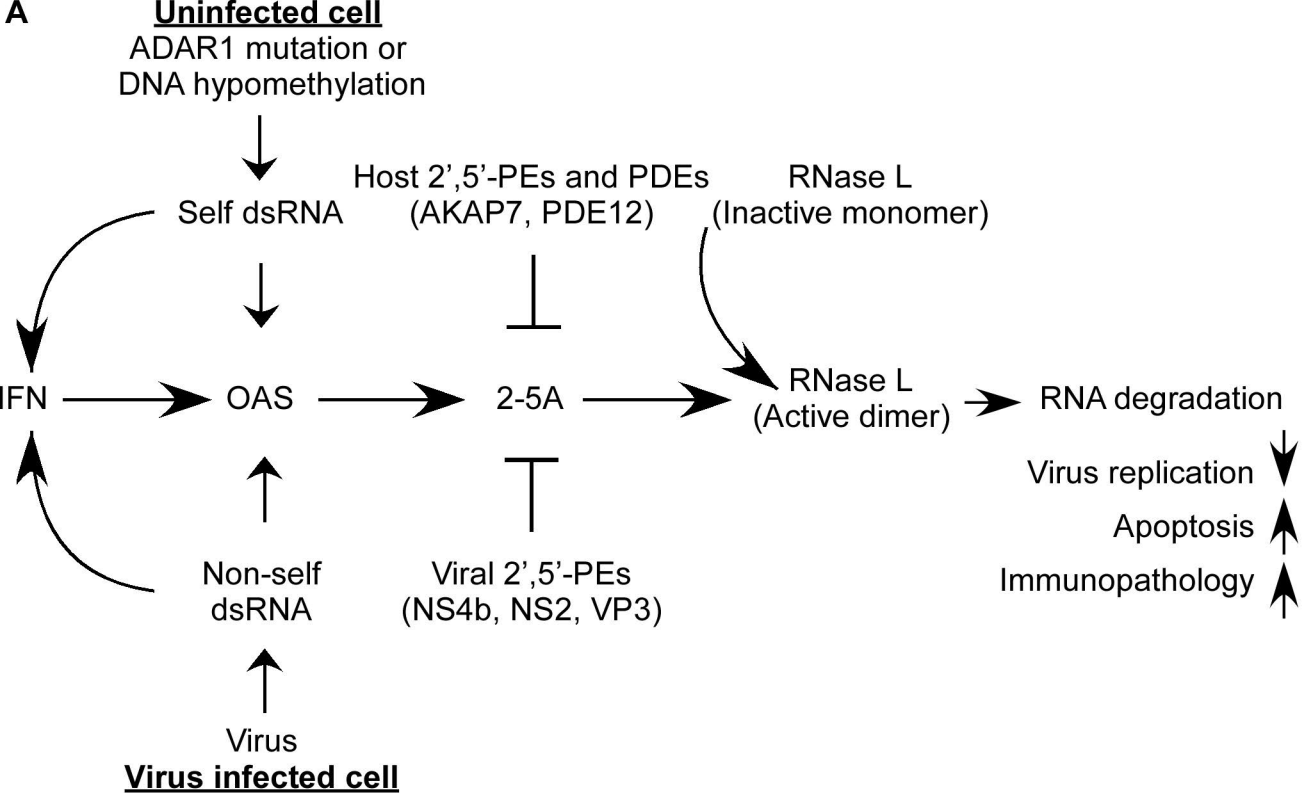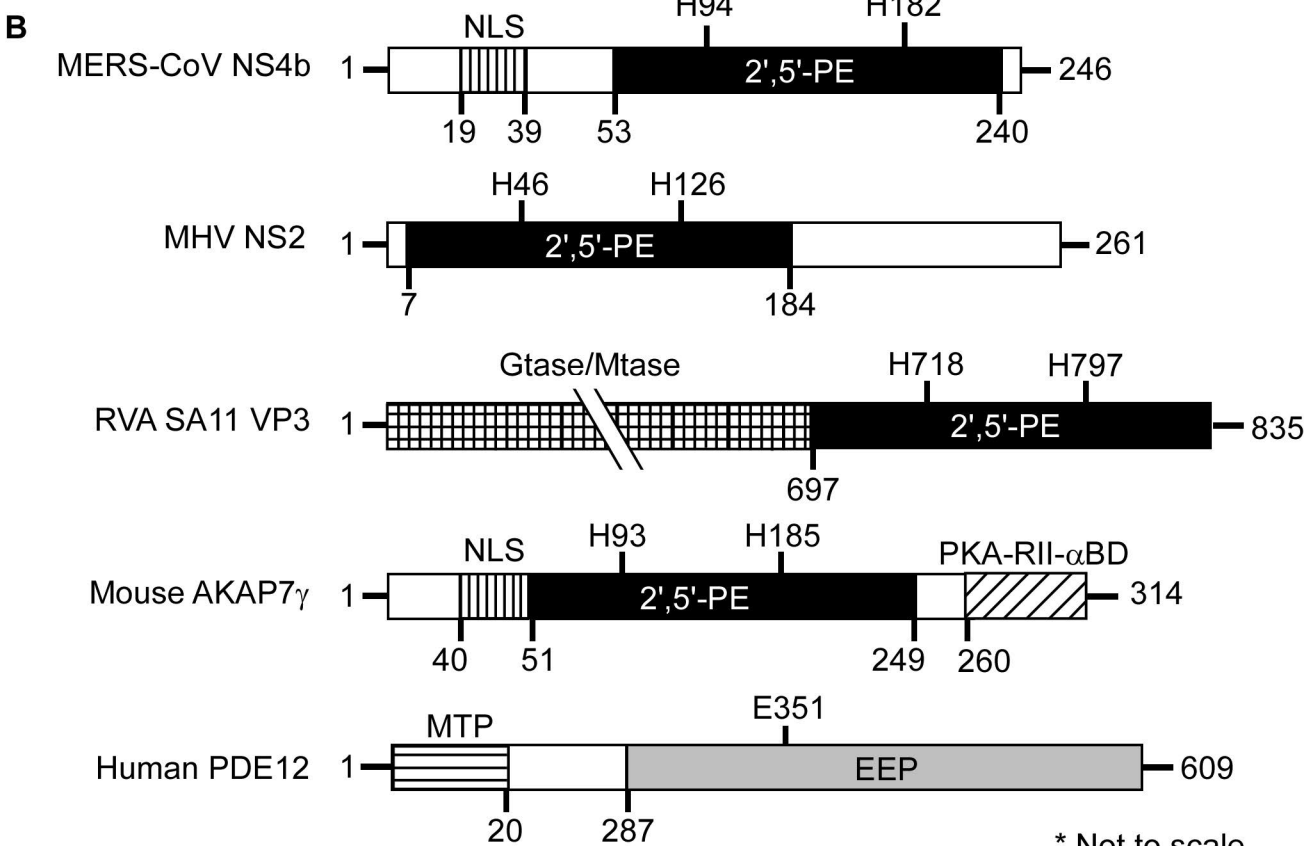

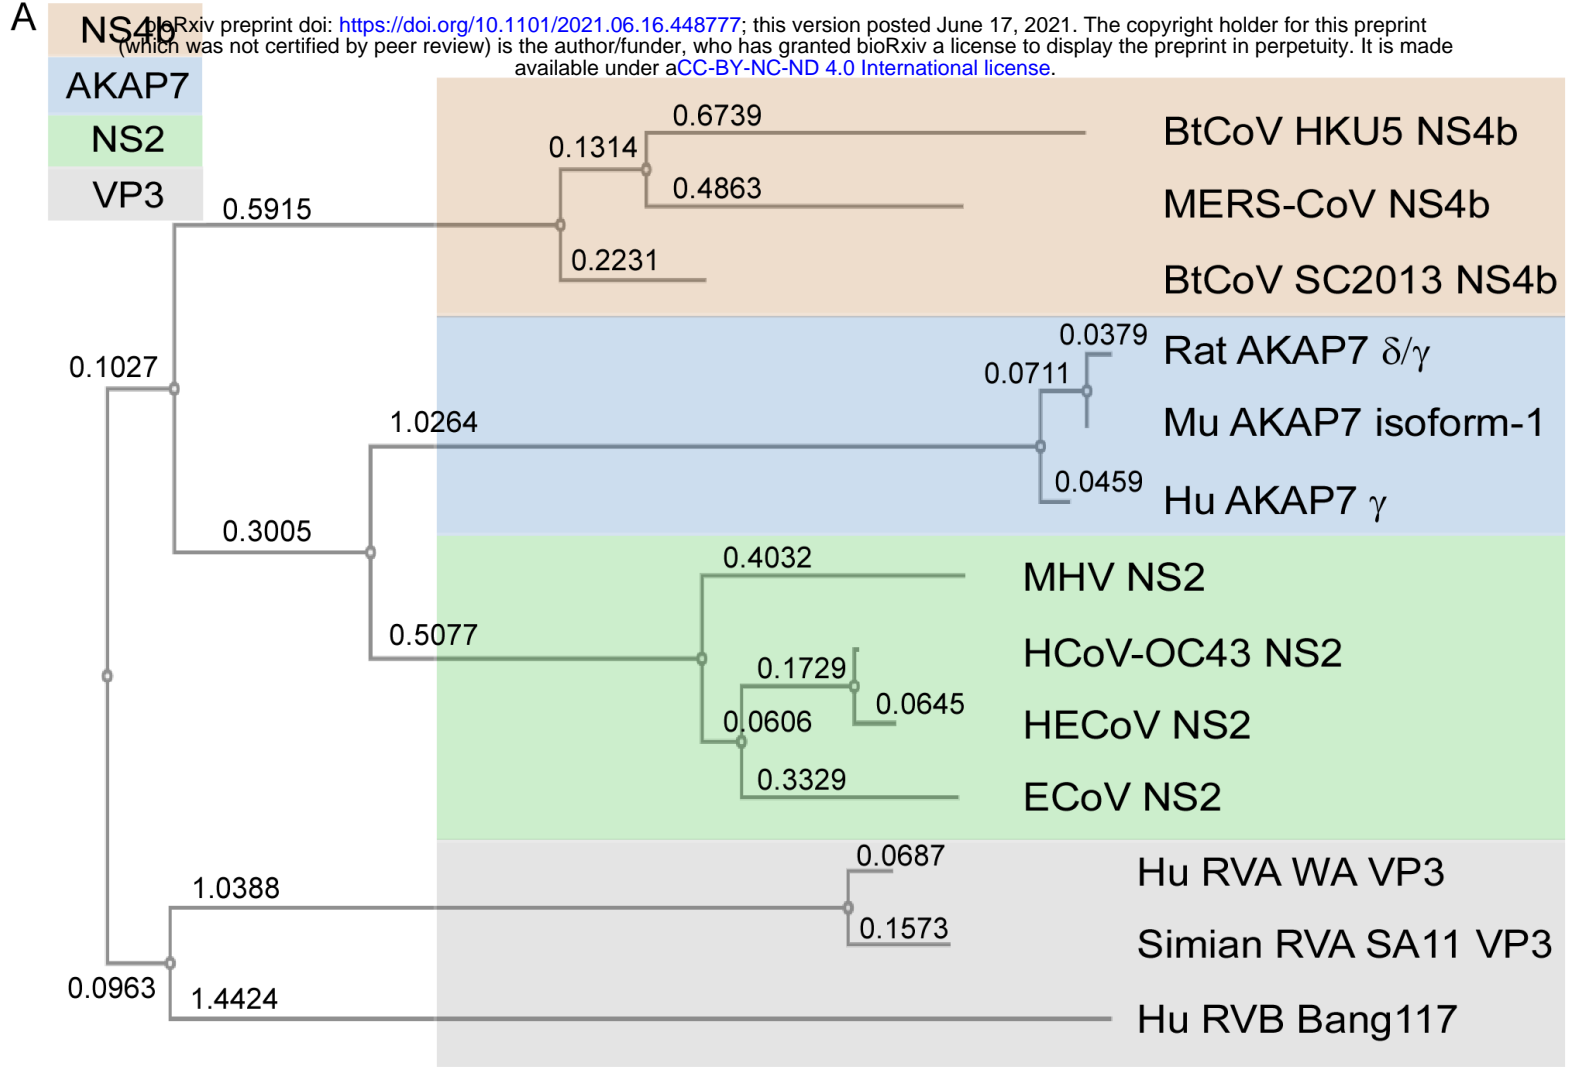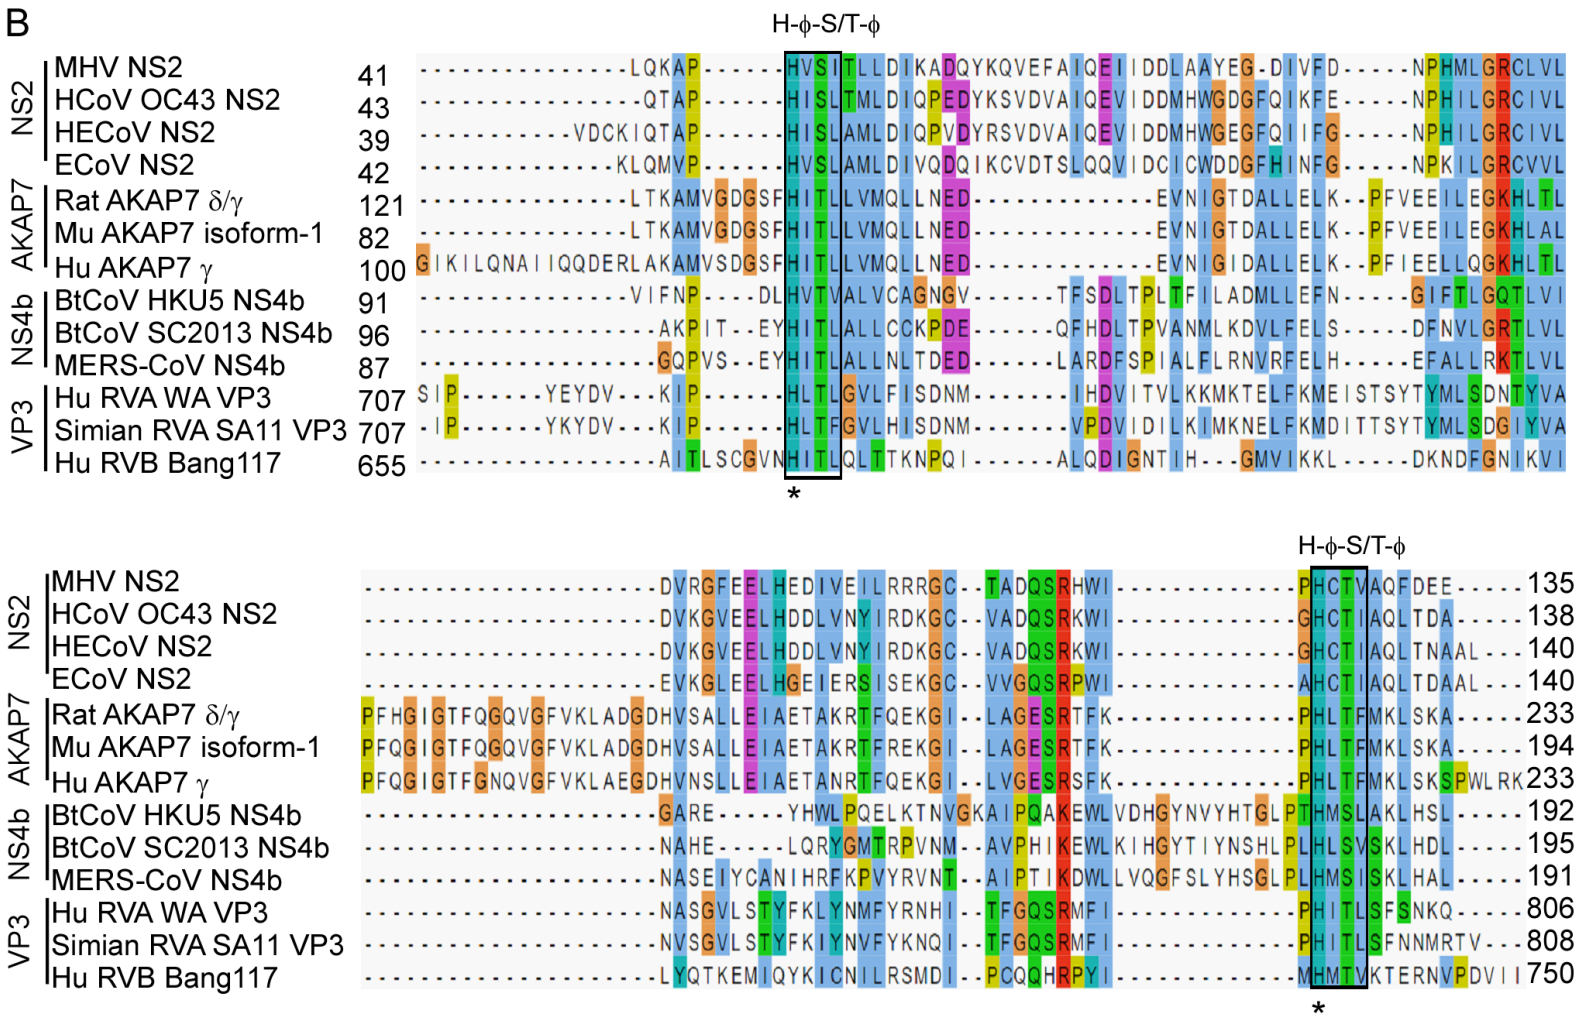

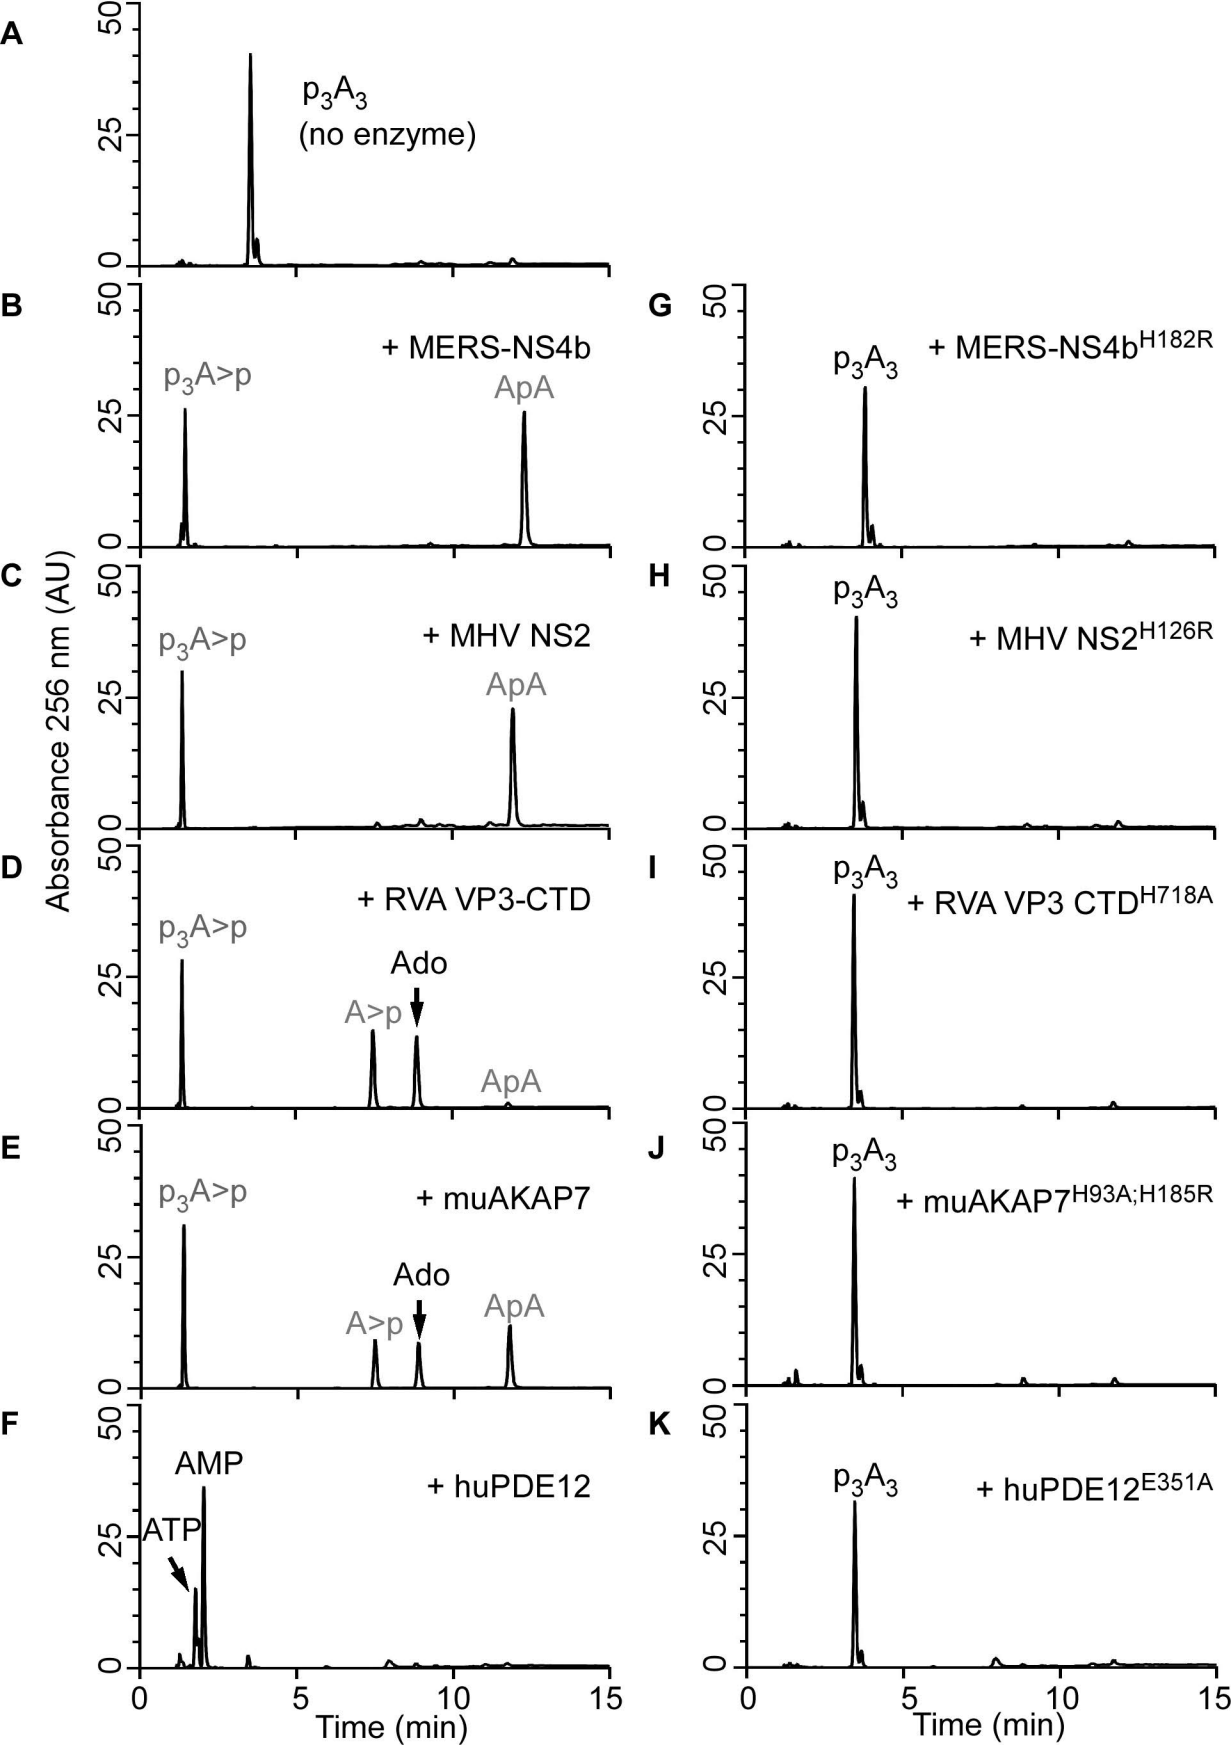

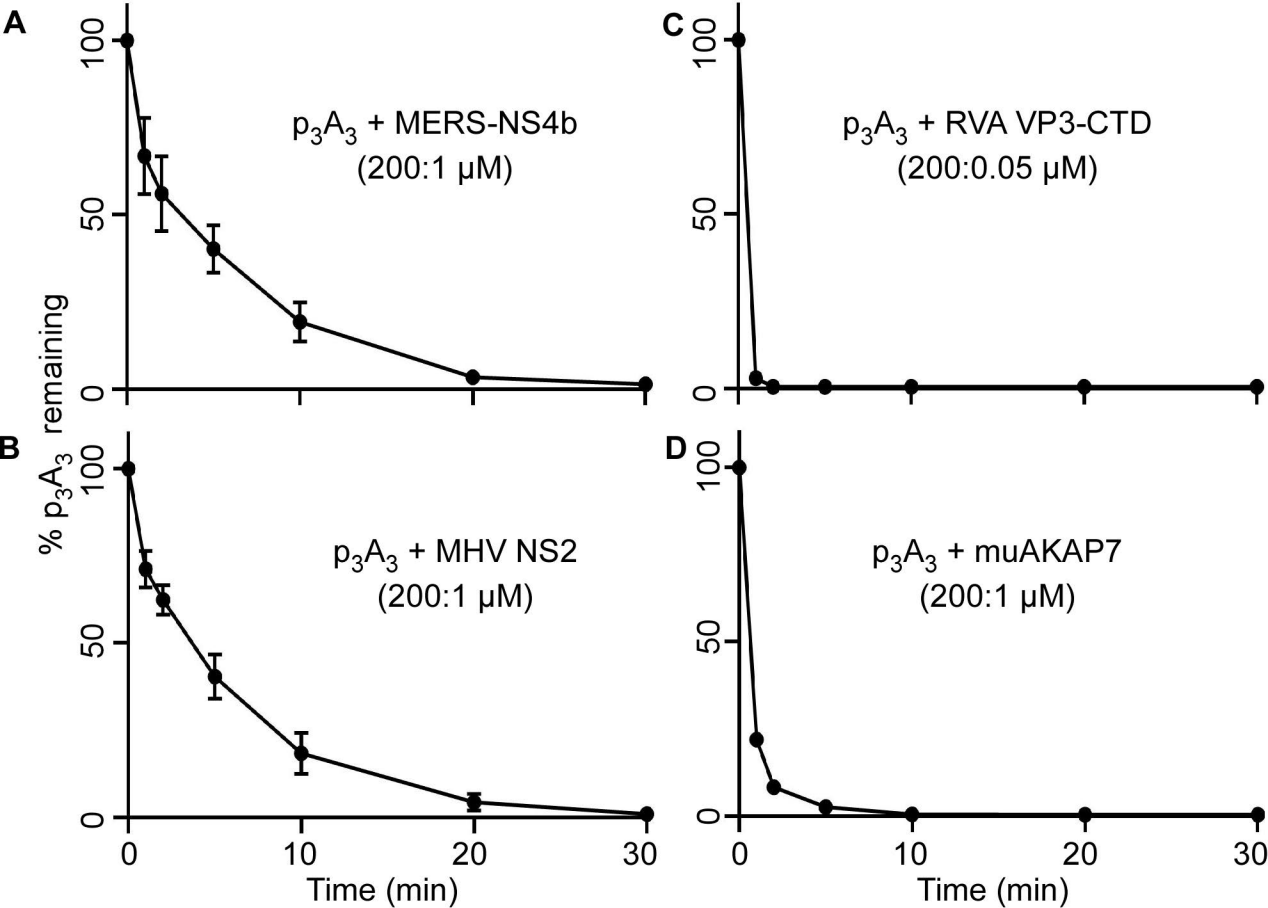

**E**

| Protein     | Specific activity ( $\text{nMol}\cdot\text{min}^{-1}\cdot\text{mg}^{-1}$ ) |                    | Specific activity ratio<br>-/+ $\text{Mg}^{2+}$ |
|-------------|----------------------------------------------------------------------------|--------------------|-------------------------------------------------|
|             | -                                                                          | + $\text{Mg}^{2+}$ |                                                 |
| MERS-NS4b   | $1707 \pm 112$                                                             | $1027 \pm 123$     | $1.66 \pm 0.226$                                |
| MHV NS2     | $1702 \pm 105$                                                             | $1666 \pm 123$     | $1.02 \pm 0.098$                                |
| RVA VP3-CTD | $66339 \pm 10$                                                             | $65694 \pm 318$    | $1.00 \pm 0.004$                                |
| muAKAP7     | $4869 \pm 18$                                                              | $3919 \pm 11$      | $1.24 \pm 0.005$                                |



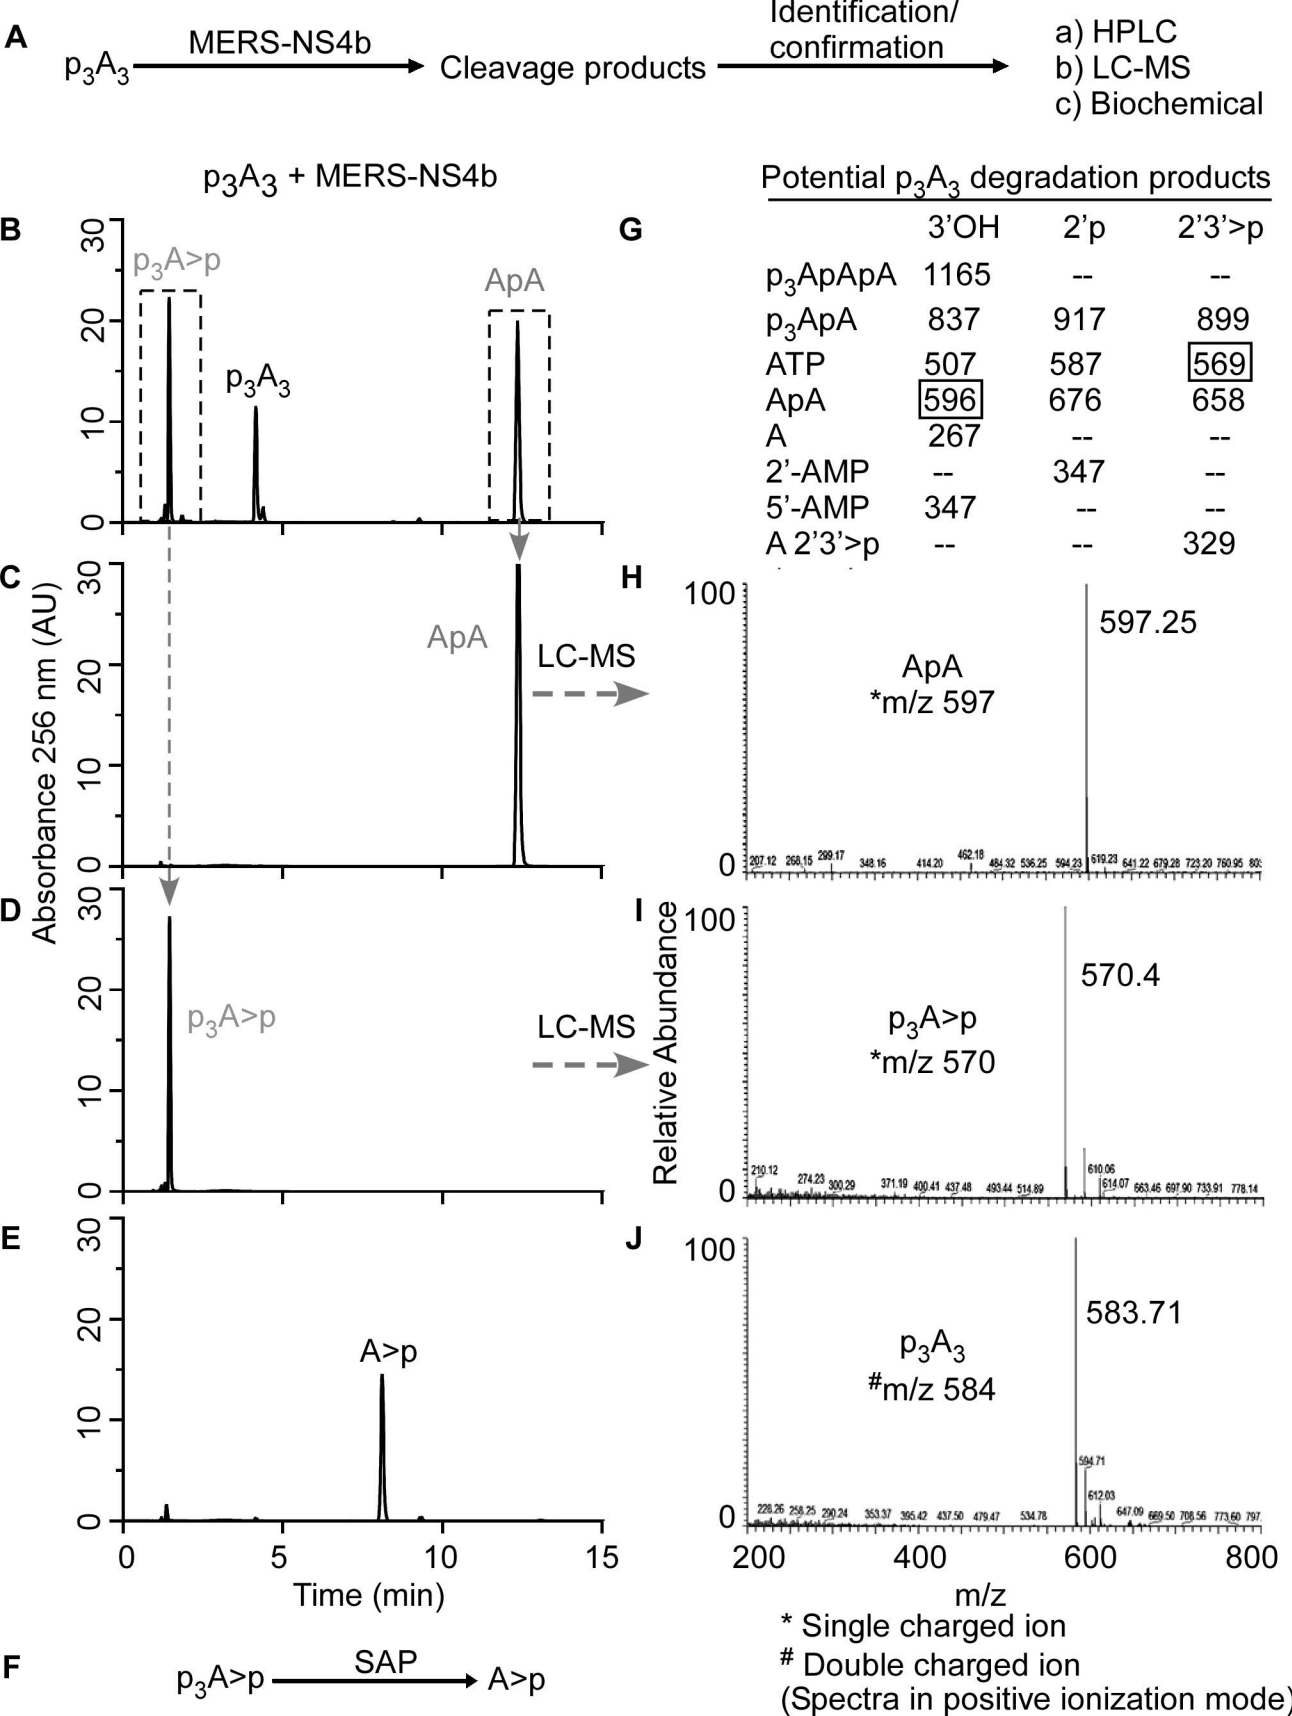

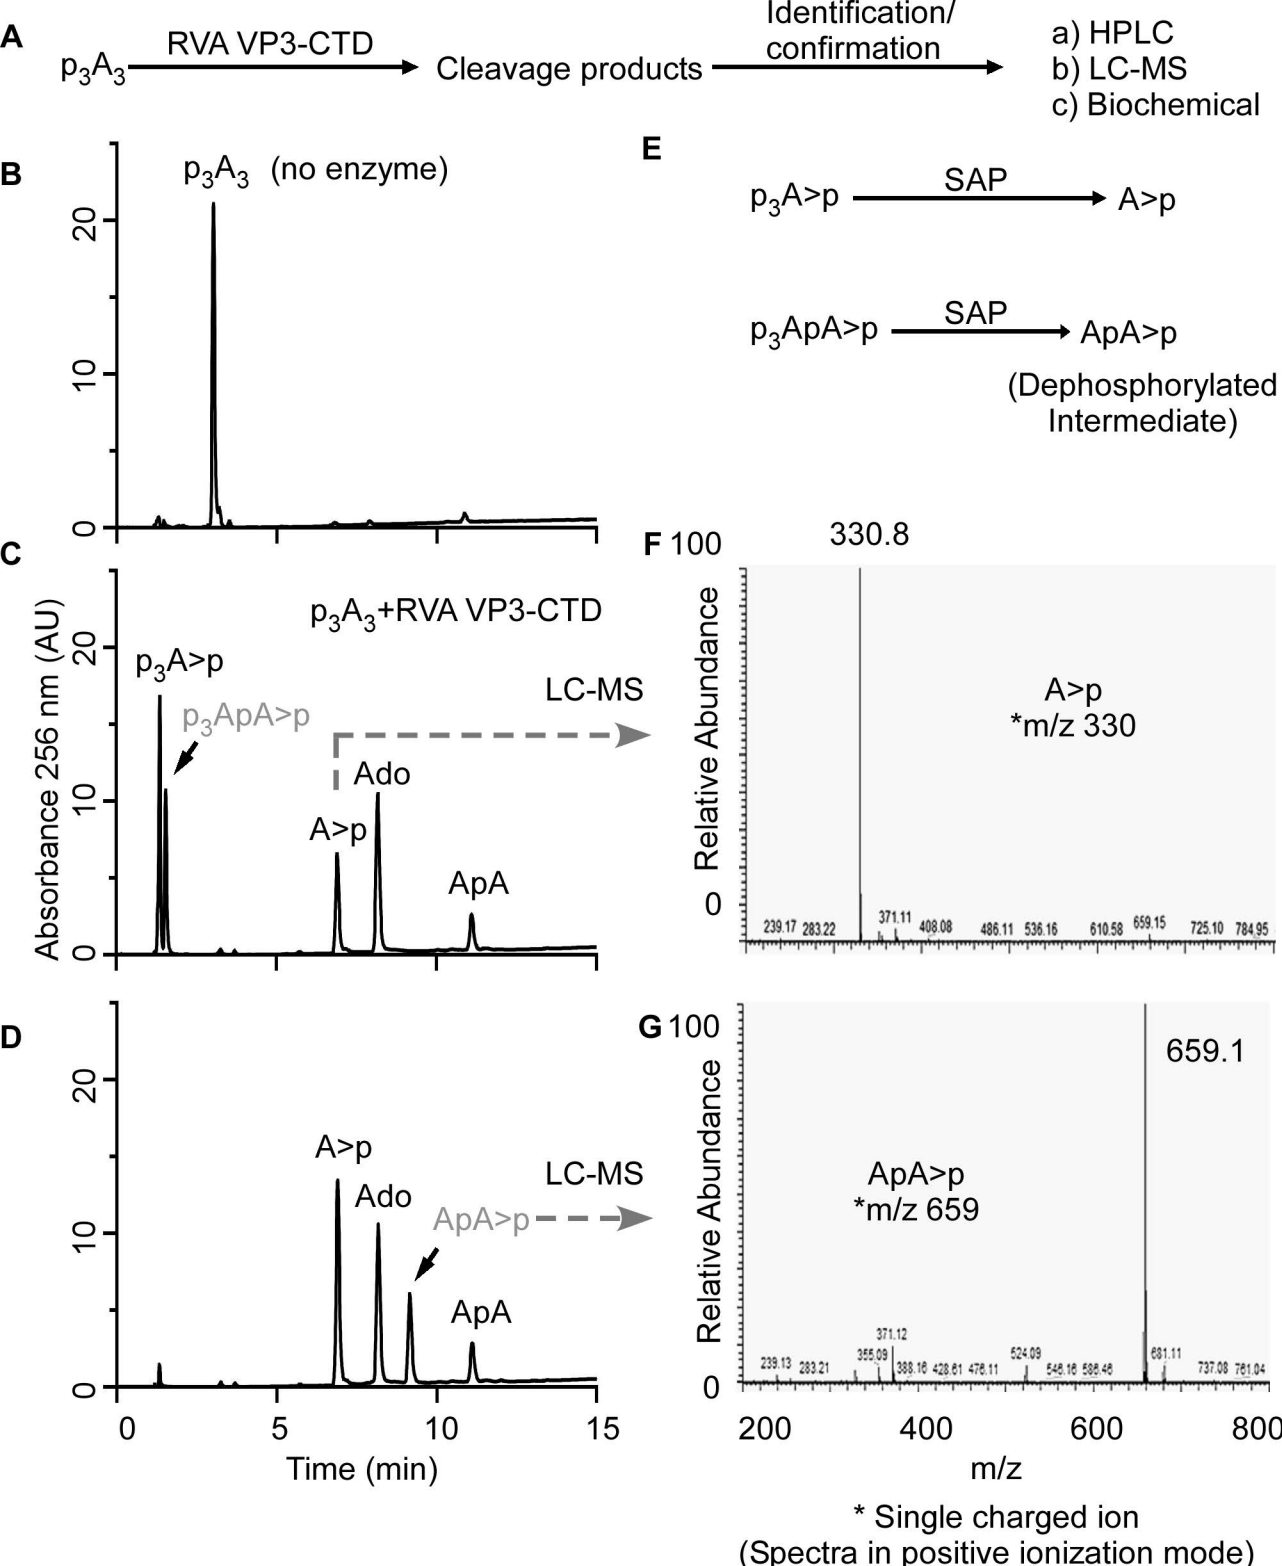

Source: https://www.biorxiv.org/content/10.1101/2021.06.16.448777v1.full.pdf
